# Supplementary material
Source: publisher site journal article supplement (https://www.dovepress.com/article/310346)
Supplement: Supplementary file 1 [file get_supplementary_file.php]

**Supplementary Materials:**


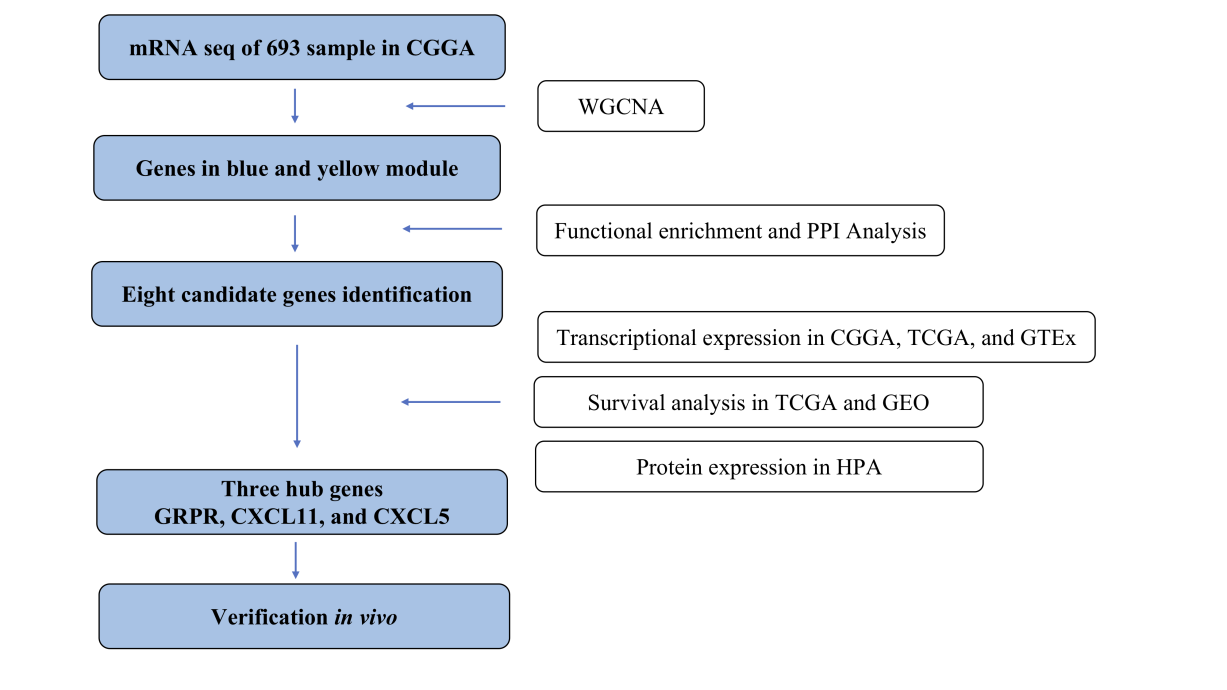


**Figure S1** The flow chart of this study.


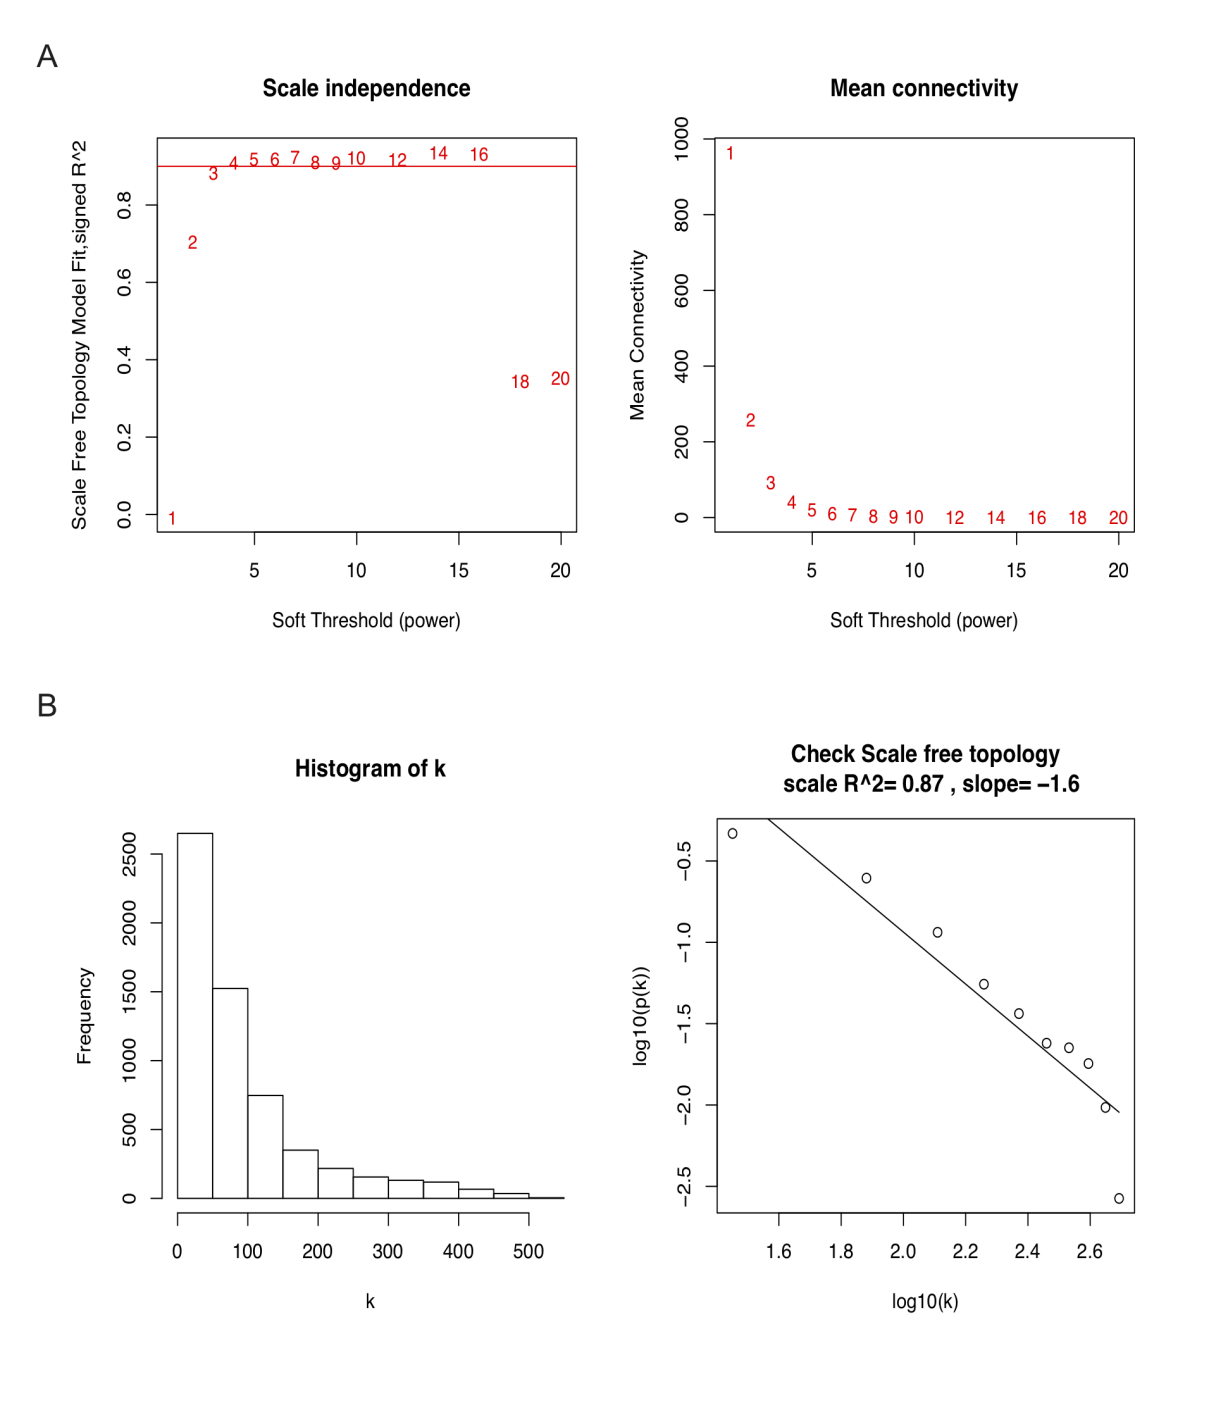


**Figure S2** (A) Identification of the soft threshold according to the standard of the scale-free network. (B) Histogram of k and fitting straight-line of k to check scale free topology


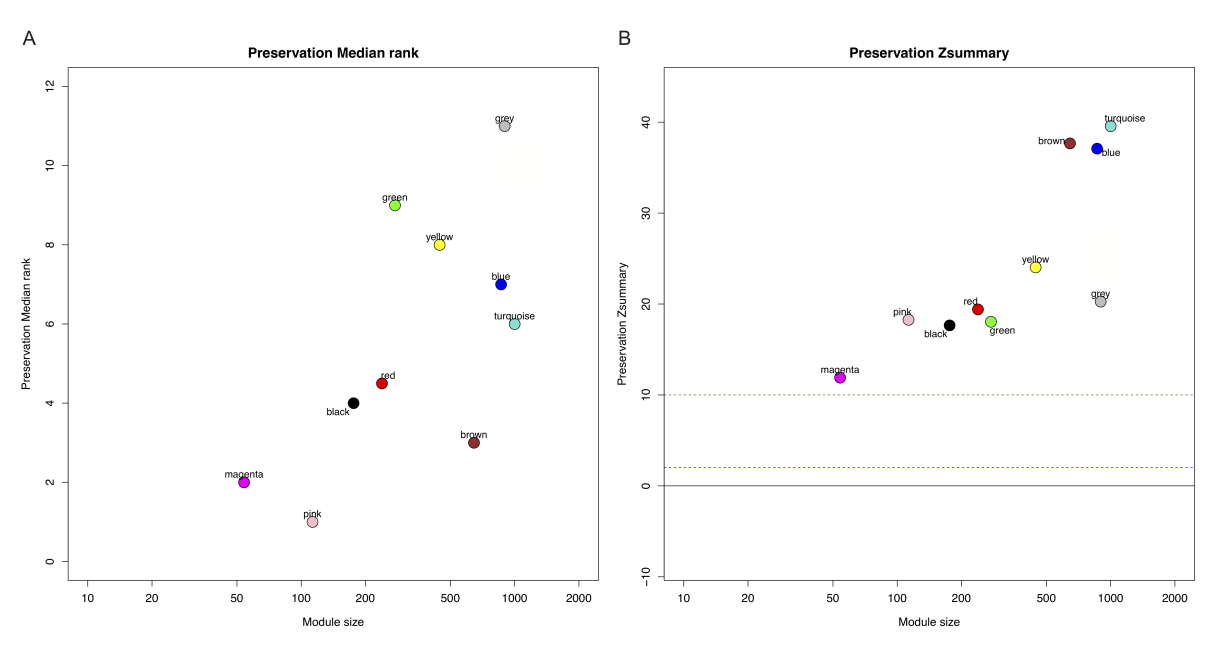


**Figure S3** Module preservation statistics of gene modules. X-axis presents module size as y-axis presents preservation median rank (A) or preservation z summary (B).


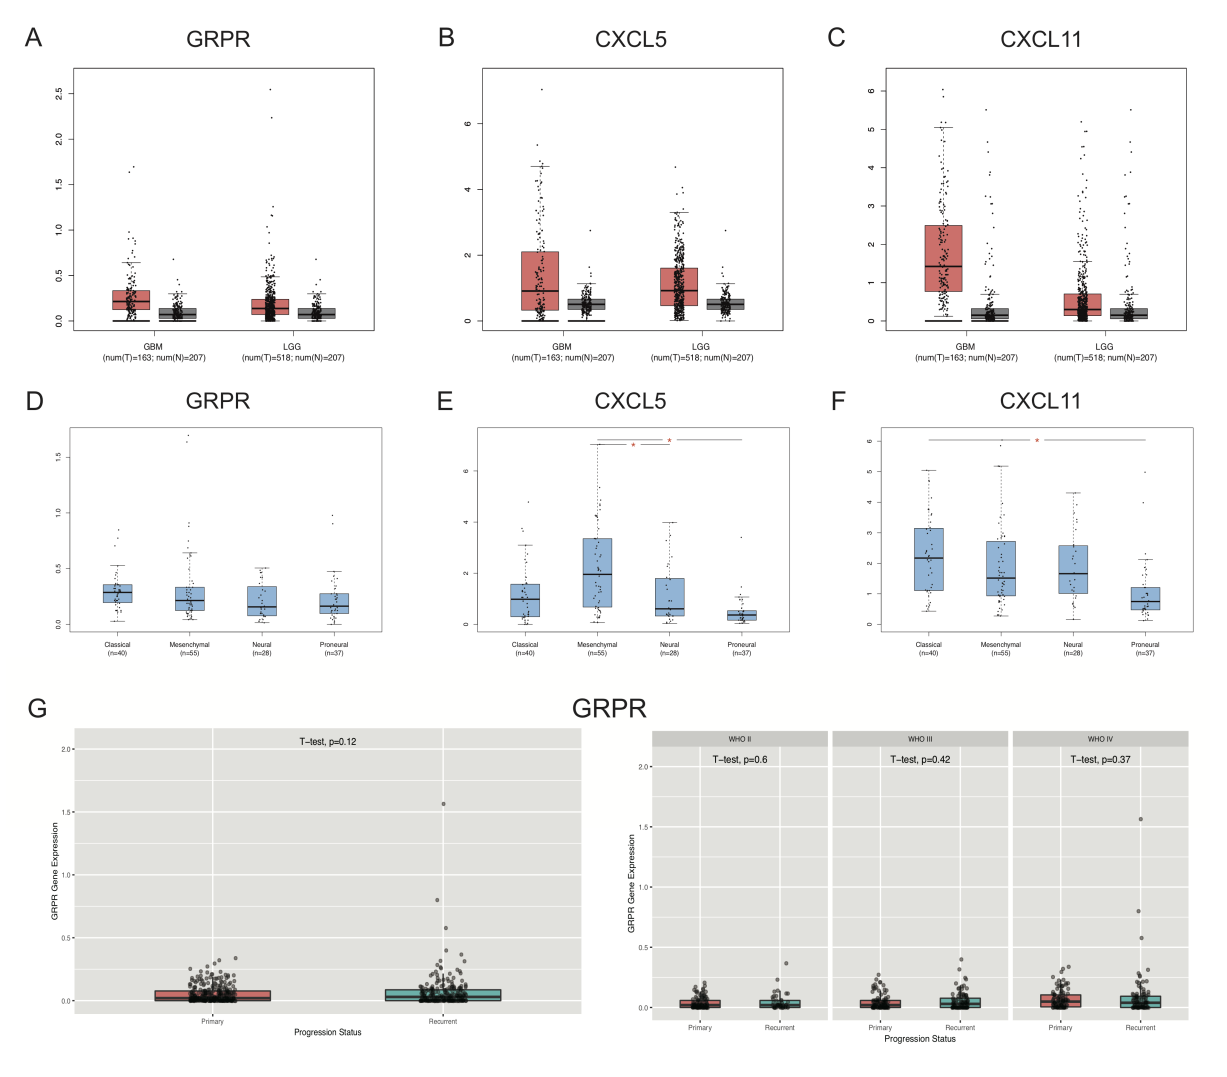


**Figure S4** Expression levels of *GRPR* (A), *CXCL5* (B), and *CXCL11* (C) among normal, GBM, and LGG samples in TCGA and GTEx. Expressions of *GRPR* (D), *CXCL5* (E), and *CXCL11* (F) in different molecular subtypes of GBM in TCGA and GTEx. * represent p-value<0.05 by one-way ANOVA. Expressions about different grades and progression status of *GRPR* in CGGA (G). P-value was tested by t-test.


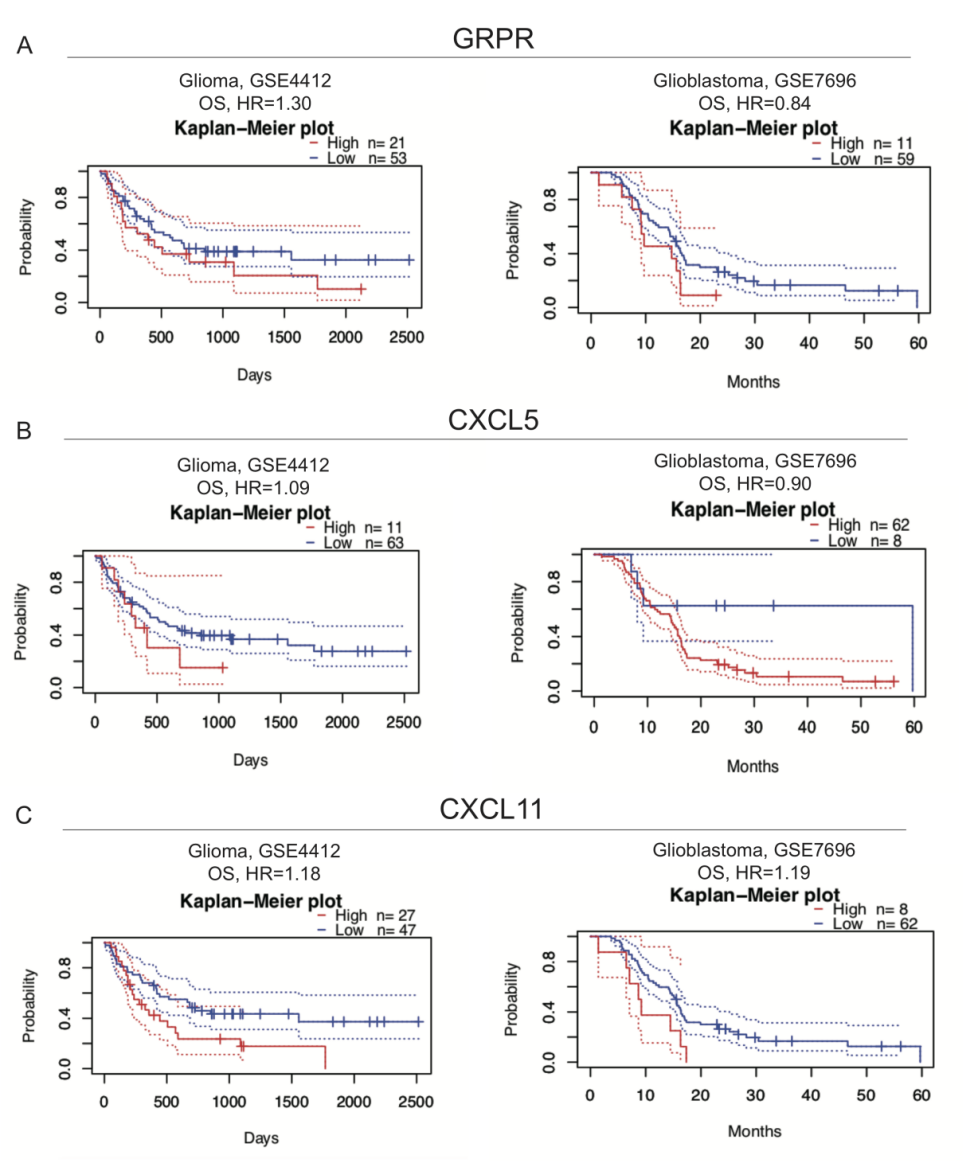


**Figure S5** Kaplan-Meier plots between groups with low and high *GRPR* (A), *CXCL5* (B), and *CXCL11* (C) expressions in GSE4412 and GSE7696. The red and blue lines represent cases with high and low expressions, separately. The X axis indicates survival time (days or months), and the Y axis indicates the probability (%).


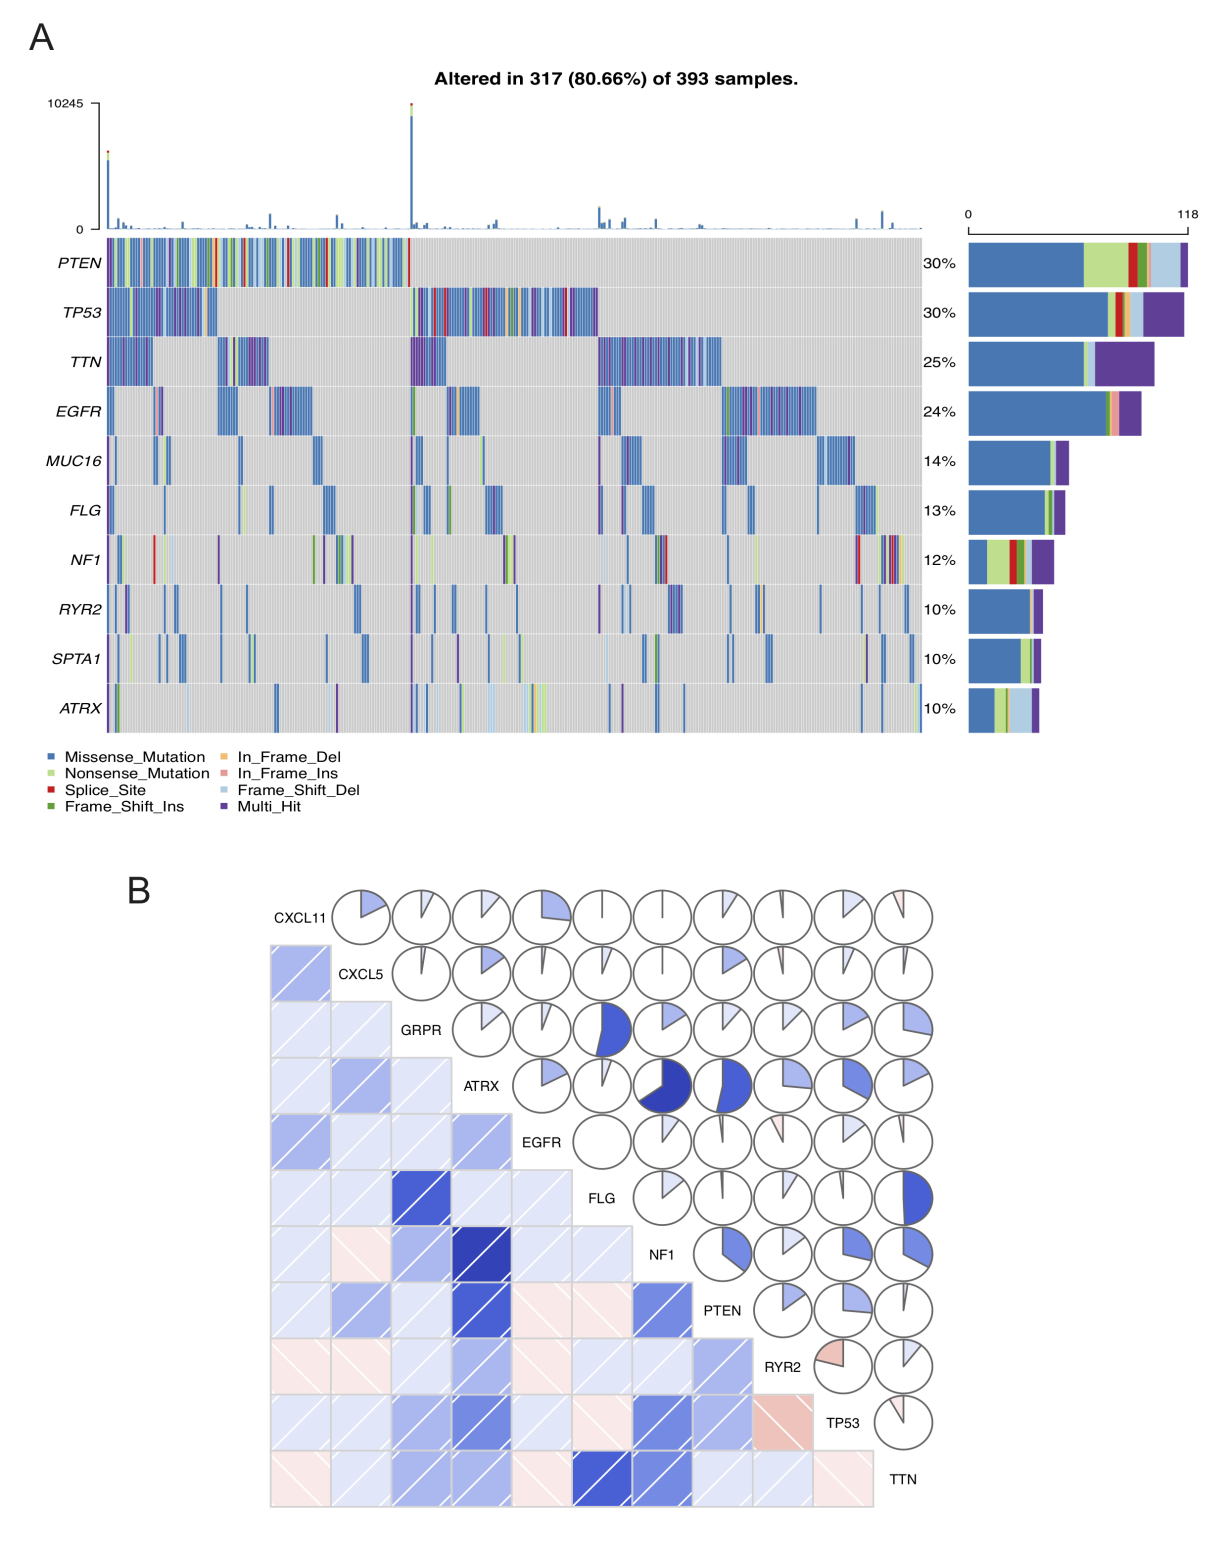


**Figure S6** Oncoplot heatmap of Top 10 altered genes in TCGA-GBM (A). Corrgram map between GRPR , CXCL5, and CXCL11 with aforementioned frequently altered genes (B).

**Table S1** Clinical information of 693 glioma samples in CGGA.

| CGGA_ID | Progression Status | Histology | Grade | Gender | Age | OS | Censor | IDH_mutation_status |
| --- | --- | --- | --- | --- | --- | --- | --- | --- |
| CGGA_1002 | Primary | AA | WHO III | Female | 43 | 305 | 1 | Wildtype |
| CGGA_1003 | Primary | OA | WHO II | Female | 47 | 3428 | 0 | Mutant |
| CGGA_1010 | Primary | A | WHO II | Male | 45 | 246 | 1 | Mutant |
| CGGA_1012 | Recurrent | rO | WHO II | Male | 45 | 3407 | 0 | Mutant |
| CGGA_1014 | Primary | A | WHO II | Male | 42 | 263 | 1 | Wildtype |
| CGGA_1017 | Primary | GBM | WHO IV | Female | 29 | 768 | 1 | Wildtype |
| CGGA_1018 | Recurrent | rO | WHO II | Male | 50 | 2527 | 1 | Mutant |
| CGGA_103 | Primary | AA | WHO III | Male | 56 | 1188 | 1 | Mutant |
| CGGA_1030 | Primary | OA | WHO II | Female | 40 | 3275 | 0 | Mutant |
| CGGA_1032 | Primary | A | WHO II | Female | 41 | 643 | 1 | Wildtype |
| CGGA_1033 | Primary | OA | WHO II | Male | 44 | 1322 | 0 | NA |
| CGGA_1036 | Primary | GBM | WHO IV | Male | 41 | 806 | 1 | Wildtype |
| CGGA_1037 | Primary | A | WHO II | Male | 44 | 780 | 0 | NA |
| CGGA_1041 | Primary | GBM | WHO IV | Male | 58 | 3204 | 0 | Wildtype |
| CGGA_1048 | Primary | OA | WHO II | Female | 27 | 703 | 0 | Wildtype |
| CGGA_1051 | Primary | A | WHO II | Male | 47 | 838 | 1 | Wildtype |
| CGGA_1055 | Primary | AA | WHO III | Male | 43 | 1611 | 1 | Mutant |
| CGGA_1057 | Primary | OA | WHO II | Female | 57 | 1549 | 1 | Wildtype |
| CGGA_1058 | Recurrent | rA | WHO II | Male | 34 | 995 | 1 | Mutant |
| CGGA_106 | Recurrent | rA | WHO II | Male | 30 | 4697 | 0 | Wildtype |
| CGGA_1063 | Primary | A | WHO II | Male | 29 | NA | NA | Mutant |
| CGGA_1065 | Primary | OA | WHO II | Female | 48 | 3023 | 0 | Mutant |
| CGGA_1066 | Primary | A | WHO II | Female | 34 | 723 | 1 | Mutant |
| CGGA_1069 | Recurrent | rA | WHO II | Male | 47 | NA | NA | Mutant |
| CGGA_107 | Recurrent | rAA | WHO III | Female | 38 | 2156 | 1 | Wildtype |
| CGGA_1075 | Primary | GBM | WHO IV | Male | 72 | 398 | 1 | Wildtype |
| CGGA_108 | Recurrent | rAA | WHO III | Male | 44 | 366 | 1 | Wildtype |
| CGGA_1082 | Primary | A | WHO II | Female | 55 | NA | NA | Mutant |
| CGGA_1086 | Primary | GBM | WHO IV | Female | 65 | 1977 | 1 | Wildtype |
| CGGA_1087 | Primary | OA | WHO II | Female | 36 | 701 | 0 | Mutant |
| CGGA_1097 | Primary | OA | WHO II | Male | 30 | 1378 | 1 | Wildtype |
| CGGA_1100 | Primary | O | WHO II | Female | 61 | 2925 | 0 | Mutant |
| CGGA_1101 | Primary | OA | WHO II | Female | 35 | 214 | 1 | Wildtype |
| CGGA_1103 | Primary | GBM | WHO IV | Female | 35 | 585 | 1 | Mutant |
| CGGA_1106 | Primary | GBM | WHO IV | Male | 37 | 420 | 1 | Wildtype |
| CGGA_1108 | Primary | AOA | WHO III | Female | 39 | 684 | 1 | Wildtype |
| CGGA_1111 | Primary | AOA | WHO III | Male | 45 | 2696 | 1 | Mutant |
| CGGA_112 | Primary | OA | WHO II | Male | 17 | 1534 | 1 | Mutant |
| CGGA_1120 | Primary | AOA | WHO III | Female | 58 | 422 | 1 | Mutant |
| CGGA_1121 | Recurrent | rAOA | WHO III | Female | 29 | 2889 | 0 | Mutant |
| CGGA_1126 | Primary | AOA | WHO III | Male | 44 | 784 | 1 | Mutant |
| CGGA_1127 | Primary | O | WHO II | Male | 33 | 2630 | 1 | NA |
| CGGA_1130 | Recurrent | rGBM | WHO IV | Female | 23 | 402 | 1 | Mutant |
| CGGA_1131 | Primary | AOA | WHO III | Female | 46 | 2862 | 0 | Mutant |
| CGGA_1132 | Recurrent | rAOA | WHO III | Female | 33 | 2862 | 0 | Mutant |
| CGGA_1134 | Primary | GBM | WHO IV | Female | 56 | 59 | 1 | Wildtype |
| CGGA_1135 | Primary | GBM | WHO IV | Male | 40 | 1244 | 1 | Wildtype |
| CGGA_1137 | Primary | AOA | WHO III | Male | 58 | 2848 | 0 | Wildtype |
| CGGA_1138 | Primary | GBM | WHO IV | Male | 54 | 411 | 1 | Wildtype |
| CGGA_1141 | Primary | AOA | WHO III | Male | 65 | 432 | 1 | Wildtype |
| CGGA_1142 | Primary | GBM | WHO IV | Male | 60 | 1005 | 1 | Wildtype |
| CGGA_1144 | Primary | AA | WHO III | Female | 39 | 2505 | 0 | Wildtype |
| CGGA_1147 | Primary | A | WHO II | Male | 36 | 2826 | 0 | Mutant |
| CGGA_1148 | Primary | A | WHO II | Male | 37 | 596 | 1 | Mutant |
| CGGA_1152 | Primary | A | WHO II | Male | 13 | 2812 | 0 | Wildtype |
| CGGA_1154 | Recurrent | rAOA | WHO III | Female | 33 | 369 | 1 | Mutant |
| CGGA_1155 | Primary | AA | WHO III | Male | 43 | 1373 | 1 | Mutant |
| CGGA_1156 | Primary | OA | WHO II | Female | 41 | 2805 | 0 | Mutant |
| CGGA_1157 | Primary | A | WHO II | Male | 64 | 727 | 1 | Wildtype |
| CGGA_1158 | Primary | OA | WHO II | Male | 39 | 2799 | 0 | Mutant |
| CGGA_1159 | Primary | OA | WHO II | Male | 51 | 2792 | 0 | Mutant |
| CGGA_1161 | Primary | AOA | WHO III | Male | 36 | 2791 | 0 | Mutant |
| CGGA_1162 | Primary | AOA | WHO III | Male | 39 | 2785 | 0 | NA |
| CGGA_1164 | Recurrent | rGBM | WHO IV | Female | 38 | 1022 | 1 | Mutant |
| CGGA_1169 | Primary | AOA | WHO III | Male | 30 | 1765 | 1 | Mutant |
| CGGA_1172 | Primary | GBM | WHO IV | Female | 36 | 2744 | 0 | Mutant |
| CGGA_1178 | Recurrent | rAOA | WHO III | Male | 41 | 422 | 1 | Mutant |
| CGGA_1181 | Primary | OA | WHO II | Male | 36 | 318 | 0 | Mutant |
| CGGA_1183 | Primary | AA | WHO III | Female | 25 | 408 | 1 | Wildtype |
| CGGA_1184 | Recurrent | rAOA | WHO III | Male | 46 | 156 | 1 | Mutant |
| CGGA_1185 | Recurrent | rAOA | WHO III | Female | 50 | 731 | 1 | Wildtype |
| CGGA_1191 | Primary | AOA | WHO III | Male | 53 | 2695 | 0 | Mutant |
| CGGA_1192 | Primary | OA | WHO II | Female | 43 | 2693 | 0 | Mutant |
| CGGA_1195 | Primary | AOA | WHO III | Male | 43 | 476 | 1 | Mutant |
| CGGA_1198 | Primary | O | WHO II | Male | 30 | 2679 | 0 | Mutant |
| CGGA_120 | Recurrent | rGBM | WHO IV | Male | 42 | 288 | 1 | Wildtype |
| CGGA_1204 | Primary | O | WHO II | Male | 53 | 2668 | 0 | Mutant |
| CGGA_1205 | Primary | AOA | WHO III | Female | 59 | 929 | 1 | Wildtype |
| CGGA_1207 | Primary | AOA | WHO III | Female | 49 | 2661 | 0 | NA |
| CGGA_1208 | Recurrent | rGBM | WHO IV | Male | 38 | 161 | 1 | Wildtype |
| CGGA_1211 | Primary | OA | WHO II | Male | 40 | 2654 | 0 | Mutant |
| CGGA_1212 | Primary | AOA | WHO III | Male | 31 | 2292 | 1 | Mutant |
| CGGA_1223 | Primary | AOA | WHO III | Male | 42 | 682 | 1 | Wildtype |
| CGGA_1226 | Primary | A | WHO II | Female | 33 | 670 | 1 | Wildtype |
| CGGA_1228 | Primary | OA | WHO II | Male | 34 | 2626 | 0 | Wildtype |
| CGGA_1232 | Primary | AOA | WHO III | Male | 39 | 2067 | 1 | Mutant |
| CGGA_1235 | Primary | AO | WHO III | Female | 32 | 2616 | 0 | Mutant |
| CGGA_1236 | Primary | GBM | WHO IV | Female | 47 | 191 | 1 | Wildtype |
| CGGA_1238 | Primary | OA | WHO II | Female | 11 | 2611 | 0 | Wildtype |
| CGGA_1239 | Primary | O | WHO II | Female | 44 | 2609 | 0 | Mutant |
| CGGA_1248 | Recurrent | rGBM | WHO IV | Male | 54 | 138 | 1 | Wildtype |
| CGGA_1255 | Recurrent | rGBM | WHO IV | Male | 49 | 118 | 1 | Wildtype |
| CGGA_1256 | Primary | GBM | WHO IV | Female | 52 | 2557 | 0 | NA |
| CGGA_1257 | Recurrent | rGBM | WHO IV | Male | 59 | 192 | 1 | Wildtype |
| CGGA_1260 | Recurrent | rGBM | WHO IV | Male | 32 | 177 | 1 | Wildtype |
| CGGA_1262 | Recurrent | rGBM | WHO IV | Female | 69 | 166 | 1 | Wildtype |
| CGGA_1264 | Primary | AO | WHO III | Female | 37 | 2541 | 0 | Mutant |
| CGGA_1269 | Primary | AO | WHO III | Female | 35 | 2535 | 0 | Mutant |
| CGGA_1273 | Recurrent | rAOA | WHO III | Male | 64 | 2438 | 0 | Mutant |
| CGGA_1282 | Primary | GBM | WHO IV | Female | 33 | 1116 | 1 | Wildtype |
| CGGA_1286 | Primary | O | WHO II | Female | 52 | 2518 | 0 | Mutant |
| CGGA_1291 | Primary | AO | WHO III | Male | 41 | 2422 | 0 | NA |
| CGGA_1295 | Recurrent | rAOA | WHO III | Male | 40 | 310 | 1 | Mutant |
| CGGA_1300 | Primary | AOA | WHO III | Male | 35 | 1793 | 1 | Mutant |
| CGGA_1303 | Primary | AOA | WHO III | Female | 45 | 2473 | 0 | Mutant |
| CGGA_1305 | Primary | AOA | WHO III | Male | 43 | 2493 | 0 | Mutant |
| CGGA_1309 | Primary | AO | WHO III | Male | 65 | 964 | 0 | NA |
| CGGA_1311 | Recurrent | rAOA | WHO III | Female | 29 | 1080 | 1 | Mutant |
| CGGA_1317 | Primary | OA | WHO II | Male | 45 | 2476 | 0 | Mutant |
| CGGA_1318 | Primary | OA | WHO II | Male | 39 | 1497 | 0 | Mutant |
| CGGA_1319 | Primary | AO | WHO III | Female | 42 | 2473 | 0 | Wildtype |
| CGGA_1321 | Primary | AOA | WHO III | Male | 46 | 702 | 1 | Mutant |
| CGGA_1325 | Recurrent | rGBM | WHO IV | Male | 20 | NA | NA | Wildtype |
| CGGA_1326 | Primary | GBM | WHO IV | Male | 45 | 322 | 1 | Mutant |
| CGGA_1334 | Primary | OA | WHO II | Female | 33 | 146 | 1 | Wildtype |
| CGGA_1335 | Primary | O | WHO II | Female | 43 | 2451 | 0 | Mutant |
| CGGA_1337 | Recurrent | rGBM | WHO IV | Male | 67 | 2172 | 1 | NA |
| CGGA_1339 | Primary | O | WHO II | Male | 41 | 2444 | 0 | Mutant |
| CGGA_1345 | Primary | OA | WHO II | Male | 56 | 2437 | 0 | Mutant |
| CGGA_135 | Primary | AA | WHO III | Female | 41 | 1924 | 1 | Wildtype |
| CGGA_1350 | Primary | O | WHO II | Male | 36 | 2431 | 0 | Mutant |
| CGGA_1353 | Primary | GBM | WHO IV | Male | 65 | 1022 | 1 | Wildtype |
| CGGA_1354 | Primary | GBM | WHO IV | Female | 40 | 530 | 1 | Wildtype |
| CGGA_1356 | Recurrent | rAOA | WHO III | Male | 52 | 948 | 1 | Mutant |
| CGGA_1359 | Recurrent | rAOA | WHO III | Male | 21 | 343 | 1 | Wildtype |
| CGGA_1361 | Primary | O | WHO II | Male | 40 | 2416 | 0 | Mutant |
| CGGA_1362 | Primary | AA | WHO III | Female | 64 | 2416 | 0 | Wildtype |
| CGGA_1365 | Primary | GBM | WHO IV | Male | 55 | 253 | 1 | Wildtype |
| CGGA_1368 | Primary | O | WHO II | Male | 49 | 2409 | 0 | Mutant |
| CGGA_1369 | Primary | AO | WHO III | Female | 37 | 360 | 0 | Mutant |
| CGGA_1371 | Primary | GBM | WHO IV | Male | 68 | 2403 | 0 | Wildtype |
| CGGA_1377 | Primary | AOA | WHO III | Male | 28 | 2392 | 0 | Mutant |
| CGGA_1378 | Primary | GBM | WHO IV | Male | 47 | 378 | 1 | Wildtype |
| CGGA_1380 | Primary | GBM | WHO IV | Male | 46 | 291 | 1 | Wildtype |
| CGGA_1382 | Primary | GBM | WHO IV | Male | 57 | 284 | 1 | Wildtype |
| CGGA_1383 | Recurrent | rAA | WHO III | Female | 47 | 884 | 0 | Mutant |
| CGGA_1386 | Primary | AO | WHO III | Male | 34 | 2382 | 0 | NA |
| CGGA_1387 | Recurrent | rGBM | WHO IV | Male | 41 | 90 | 1 | Wildtype |
| CGGA_1389 | Primary | AOA | WHO III | Female | 67 | 1669 | 1 | Mutant |
| CGGA_139 | Primary | GBM | WHO IV | Male | 59 | 694 | 1 | Mutant |
| CGGA_1390 | Recurrent | rAOA | WHO III | Male | 50 | 2050 | 0 | Mutant |
| CGGA_1391 | Primary | GBM | WHO IV | Male | 62 | 426 | 0 | Wildtype |
| CGGA_1392 | Primary | GBM | WHO IV | Male | 62 | 473 | 1 | Wildtype |
| CGGA_1398 | Recurrent | rAOA | WHO III | Male | 43 | 554 | 1 | Mutant |
| CGGA_1400 | Recurrent | rAO | WHO III | Female | 53 | 2354 | 0 | NA |
| CGGA_1401 | Primary | AA | WHO III | Male | 39 | 1680 | 1 | Mutant |
| CGGA_1402 | Primary | GBM | WHO IV | Male | 30 | 2354 | 0 | Wildtype |
| CGGA_1403 | Primary | GBM | WHO IV | Female | 43 | 679 | 1 | Wildtype |
| CGGA_1404 | Primary | AOA | WHO III | Female | 56 | 2353 | 0 | Mutant |
| CGGA_1407 | Primary | AO | WHO III | Female | 29 | 2340 | 0 | Mutant |
| CGGA_1410 | Primary | GBM | WHO IV | Female | 27 | 825 | 1 | Wildtype |
| CGGA_1413 | Primary | AO | WHO III | Male | 35 | 2339 | 0 | Mutant |
| CGGA_1415 | Recurrent | rGBM | WHO IV | Female | 30 | 2338 | 0 | Wildtype |
| CGGA_1416 | Primary | AO | WHO III | Male | 42 | 1933 | 1 | Mutant |
| CGGA_1417 | Primary | AOA | WHO III | Male | 56 | 2332 | 0 | Mutant |
| CGGA_1418 | Primary | GBM | WHO IV | Female | 73 | 287 | 1 | Wildtype |
| CGGA_1419 | Recurrent | rGBM | WHO IV | Male | 56 | 249 | 1 | Wildtype |
| CGGA_1420 | Primary | GBM | WHO IV | Male | 60 | 364 | 1 | Wildtype |
| CGGA_1421 | Primary | AO | WHO III | Male | 35 | 2318 | 0 | NA |
| CGGA_1422 | Primary | GBM | WHO IV | Male | 76 | 204 | 1 | Wildtype |
| CGGA_1424 | Primary | AO | WHO III | Female | 41 | 2311 | 0 | Mutant |
| CGGA_1425 | Primary | GBM | WHO IV | Female | 22 | 640 | 1 | Wildtype |
| CGGA_1426 | Primary | GBM | WHO IV | Female | 50 | 133 | 1 | Wildtype |
| CGGA_1427 | Primary | OA | WHO II | Female | 30 | 339 | 0 | NA |
| CGGA_1429 | Recurrent | rGBM | WHO IV | Female | 40 | 2304 | 0 | Mutant |
| CGGA_1430 | Recurrent | rGBM | WHO IV | Female | 28 | 162 | 1 | Wildtype |
| CGGA_1431 | Primary | AA | WHO III | Male | 48 | 2048 | 1 | Mutant |
| CGGA_1433 | Primary | GBM | WHO IV | Female | 72 | 394 | 1 | Wildtype |
| CGGA_1434 | Recurrent | rAA | WHO III | Male | 61 | 67 | 1 | Wildtype |
| CGGA_1435 | Primary | AOA | WHO III | Female | 46 | 1657 | 1 | Mutant |
| CGGA_1437 | Recurrent | rAOA | WHO III | Male | 48 | 1037 | 1 | Wildtype |
| CGGA_1440 | Primary | O | WHO II | Female | 29 | 2289 | 0 | Mutant |
| CGGA_1441 | Primary | GBM | WHO IV | Male | 70 | 1882 | 1 | Wildtype |
| CGGA_1443 | Recurrent | rOA | WHO II | Male | 41 | 2284 | 0 | Wildtype |
| CGGA_1444 | Primary | GBM | WHO IV | Female | 68 | 378 | 1 | Wildtype |
| CGGA_1445 | Recurrent | rAOA | WHO III | Male | 37 | 2283 | 0 | Wildtype |
| CGGA_1446 | Primary | OA | WHO II | Male | 29 | 2283 | 0 | Mutant |
| CGGA_1447 | Recurrent | rAOA | WHO III | Male | 48 | 308 | 1 | Wildtype |
| CGGA_1451 | Primary | GBM | WHO IV | Female | 45 | 438 | 1 | Wildtype |
| CGGA_1452 | Primary | GBM | WHO IV | Male | 53 | 468 | 1 | Wildtype |
| CGGA_1454 | Primary | OA | WHO II | Female | 42 | 2274 | 0 | Wildtype |
| CGGA_1455 | Primary | O | WHO II | Male | 40 | 2274 | 0 | Mutant |
| CGGA_1457 | Primary | GBM | WHO IV | Male | 60 | 312 | 1 | Wildtype |
| CGGA_1458 | Recurrent | rAOA | WHO III | Female | 54 | 127 | 1 | Mutant |
| CGGA_1459 | Recurrent | rAOA | WHO III | Male | 55 | 503 | 1 | Wildtype |
| CGGA_1461 | Primary | GBM | WHO IV | Female | 60 | 226 | 1 | Wildtype |
| CGGA_1462 | Primary | GBM | WHO IV | Male | 49 | 174 | 1 | Wildtype |
| CGGA_1463 | Primary | O | WHO II | Female | 69 | 2252 | 0 | Mutant |
| CGGA_1467 | Primary | GBM | WHO IV | Male | 58 | 866 | 1 | Mutant |
| CGGA_1469 | Primary | AOA | WHO III | Male | 46 | 2245 | 0 | Mutant |
| CGGA_1471 | Primary | OA | WHO II | Male | 45 | 2249 | 0 | Mutant |
| CGGA_1472 | Primary | GBM | WHO IV | Male | 34 | 1025 | 1 | NA |
| CGGA_1473 | Recurrent | rAA | WHO III | Female | 28 | 265 | 1 | NA |
| CGGA_1474 | Primary | AO | WHO III | Female | 50 | 333 | 0 | Mutant |
| CGGA_1476 | Primary | GBM | WHO IV | Female | 53 | 299 | 1 | Wildtype |
| CGGA_1477 | Primary | OA | WHO II | Male | 43 | 1194 | 1 | NA |
| CGGA_1478 | Primary | GBM | WHO IV | Female | 72 | 542 | 1 | Wildtype |
| CGGA_1480 | Recurrent | rGBM | WHO IV | Male | 41 | 405 | 1 | Wildtype |
| CGGA_1481 | Primary | GBM | WHO IV | Male | 55 | 131 | 1 | Wildtype |
| CGGA_1482 | Primary | AO | WHO III | Male | 38 | 2212 | 0 | NA |
| CGGA_1486 | Primary | GBM | WHO IV | Male | 45 | 184 | 1 | Wildtype |
| CGGA_1487 | Recurrent | rAA | WHO III | Female | 49 | 520 | 1 | Wildtype |
| CGGA_1488 | Primary | OA | WHO II | Male | 31 | 2206 | 0 | Mutant |
| CGGA_1491 | Primary | GBM | WHO IV | Male | 29 | 246 | 1 | Mutant |
| CGGA_1492 | Recurrent | rGBM | WHO IV | Female | 47 | 268 | 1 | Wildtype |
| CGGA_1494 | Primary | GBM | WHO IV | Male | 21 | 269 | 1 | Wildtype |
| CGGA_1496 | Recurrent | rGBM | WHO IV | Female | 42 | 330 | 1 | Mutant |
| CGGA_1497 | Primary | AOA | WHO III | Female | 24 | 1178 | 1 | Mutant |
| CGGA_1498 | Primary | GBM | WHO IV | Male | 69 | NA | NA | Wildtype |
| CGGA_1500 | Primary | GBM | WHO IV | Female | 45 | 108 | 1 | Wildtype |
| CGGA_1501 | Primary | GBM | WHO IV | Male | 58 | 222 | 1 | NA |
| CGGA_1502 | Primary | OA | WHO II | Female | 27 | 2185 | 0 | Mutant |
| CGGA_1503 | Primary | GBM | WHO IV | Male | 47 | 777 | 1 | Wildtype |
| CGGA_1504 | Primary | AOA | WHO III | Female | 44 | 2178 | 0 | Mutant |
| CGGA_1505 | Recurrent | rGBM | WHO IV | Male | 30 | 172 | 1 | Mutant |
| CGGA_1507 | Recurrent | rGBM | WHO IV | Female | 41 | 715 | 1 | Wildtype |
| CGGA_1508 | Primary | AOA | WHO III | Male | 39 | 1049 | 1 | Mutant |
| CGGA_1510 | Recurrent | rAOA | WHO III | Male | 40 | 271 | 1 | Mutant |
| CGGA_1513 | Recurrent | rAOA | WHO III | Female | 36 | 2151 | 0 | Mutant |
| CGGA_1514 | Primary | OA | WHO II | Female | 57 | 76 | 1 | Wildtype |
| CGGA_1516 | Primary | OA | WHO II | Male | 46 | 2150 | 0 | Mutant |
| CGGA_1517 | Primary | O | WHO II | Male | 42 | 2150 | 0 | Mutant |
| CGGA_1518 | Primary | AOA | WHO III | Female | 19 | 411 | 1 | Wildtype |
| CGGA_1520 | Recurrent | rGBM | WHO IV | Female | 67 | 297 | 1 | Wildtype |
| CGGA_1521 | Primary | GBM | WHO IV | Female | 63 | 205 | 1 | Wildtype |
| CGGA_1523 | Primary | OA | WHO II | Male | 50 | 2141 | 0 | Mutant |
| CGGA_1524 | Recurrent | rAOA | WHO III | Male | 36 | 1004 | 1 | Mutant |
| CGGA_1525 | Primary | AOA | WHO III | Male | 41 | 1686 | 1 | NA |
| CGGA_1526 | Primary | AOA | WHO III | Male | 39 | 2122 | 0 | Mutant |
| CGGA_1527 | Primary | AOA | WHO III | Male | 47 | 1714 | 1 | Mutant |
| CGGA_1528 | Primary | O | WHO II | Female | 27 | 2117 | 0 | Mutant |
| CGGA_1529 | Primary | GBM | WHO IV | Male | 63 | 583 | 1 | Wildtype |
| CGGA_1530 | Primary | AOA | WHO III | Male | 41 | 2117 | 0 | NA |
| CGGA_1531 | Primary | AOA | WHO III | Male | 36 | NA | NA | Mutant |
| CGGA_1533 | Recurrent | rAOA | WHO III | Female | 61 | 1217 | 1 | Wildtype |
| CGGA_1534 | Primary | GBM | WHO IV | Female | 58 | 27 | 1 | Mutant |
| CGGA_1535 | Recurrent | rGBM | WHO IV | Male | 43 | 232 | 1 | Mutant |
| CGGA_1536 | Primary | OA | WHO II | Male | 53 | 840 | 1 | Mutant |
| CGGA_1537 | Primary | GBM | WHO IV | Male | 73 | 97 | 1 | Wildtype |
| CGGA_1538 | Recurrent | rGBM | WHO IV | Female | 57 | 247 | 1 | Wildtype |
| CGGA_1539 | Primary | GBM | WHO IV | Male | 61 | 2088 | 0 | Mutant |
| CGGA_1541 | Recurrent | rGBM | WHO IV | Female | 50 | 67 | 1 | Wildtype |
| CGGA_1542 | Primary | GBM | WHO IV | Male | 26 | 184 | 0 | Mutant |
| CGGA_1543 | Primary | GBM | WHO IV | Male | 57 | 723 | 1 | Mutant |
| CGGA_1544 | Primary | AOA | WHO III | Female | 38 | 208 | 1 | Mutant |
| CGGA_1546 | Primary | GBM | WHO IV | Male | 56 | 223 | 1 | Wildtype |
| CGGA_1548 | Primary | GBM | WHO IV | Male | 53 | 1054 | 1 | Wildtype |
| CGGA_1551 | Primary | GBM | WHO IV | Female | 50 | 347 | 1 | NA |
| CGGA_1552 | Primary | AOA | WHO III | Male | 39 | 2052 | 0 | Mutant |
| CGGA_1553 | Recurrent | rAOA | WHO III | Male | 30 | 540 | 1 | Mutant |
| CGGA_1554 | Recurrent | rAOA | WHO III | Male | 34 | 824 | 1 | Mutant |
| CGGA_1557 | Primary | AOA | WHO III | Male | 47 | 2047 | 0 | Mutant |
| CGGA_1558 | Recurrent | rGBM | WHO IV | Male | 71 | 130 | 1 | Wildtype |
| CGGA_1559 | Primary | GBM | WHO IV | Male | 63 | 603 | 1 | Mutant |
| CGGA_1560 | Primary | GBM | WHO IV | Female | 35 | 459 | 1 | Mutant |
| CGGA_1562 | Primary | AO | WHO III | Male | 51 | 2045 | 0 | Mutant |
| CGGA_1563 | Primary | A | WHO II | Female | 32 | 2043 | 0 | Wildtype |
| CGGA_1564 | Primary | GBM | WHO IV | Male | 48 | 190 | 1 | Wildtype |
| CGGA_1565 | Primary | AOA | WHO III | Female | 23 | 1417 | 0 | Mutant |
| CGGA_1566 | Primary | AOA | WHO III | Female | 43 | 2040 | 0 | Mutant |
| CGGA_1567 | Primary | AO | WHO III | Female | 48 | 840 | 1 | Mutant |
| CGGA_1568 | Primary | AA | WHO III | Female | 26 | 345 | 0 | NA |
| CGGA_1569 | Primary | AOA | WHO III | Female | 27 | 1406 | 0 | Wildtype |
| CGGA_157 | Recurrent | rA | WHO II | Male | 34 | 914 | 1 | NA |
| CGGA_1571 | Primary | GBM | WHO IV | Female | 43 | 412 | 0 | Mutant |
| CGGA_1572 | Recurrent | rGBM | WHO IV | Female | 60 | 160 | 1 | Wildtype |
| CGGA_1575 | Recurrent | rAOA | WHO III | Male | 37 | 129 | 1 | Mutant |
| CGGA_1579 | Primary | OA | WHO II | Male | 37 | 2018 | 0 | Wildtype |
| CGGA_1580 | Primary | AA | WHO III | Female | 34 | 1581 | 1 | Mutant |
| CGGA_1583 | Primary | OA | WHO II | Female | 51 | 1606 | 1 | NA |
| CGGA_1586 | Primary | GBM | WHO IV | Female | 55 | 232 | 1 | Wildtype |
| CGGA_1587 | Primary | AA | WHO III | Female | 30 | 750 | 1 | Mutant |
| CGGA_1588 | Primary | AOA | WHO III | Female | 24 | 2003 | 0 | Wildtype |
| CGGA_1589 | Recurrent | rA | WHO II | Male | 49 | 342 | 1 | Wildtype |
| CGGA_1591 | Recurrent | rAOA | WHO III | Male | 54 | 1133 | 1 | Mutant |
| CGGA_1592 | Recurrent | rAOA | WHO III | Male | 37 | 1588 | 1 | Mutant |
| CGGA_1594 | Recurrent | rA | WHO II | Male | 25 | 480 | 0 | NA |
| CGGA_1595 | Primary | GBM | WHO IV | Female | 34 | 1983 | 0 | NA |
| CGGA_1596 | Primary | GBM | WHO IV | Male | 63 | 205 | 1 | Wildtype |
| CGGA_1597 | Primary | GBM | WHO IV | Male | 58 | 174 | 1 | Wildtype |
| CGGA_1598 | Primary | AOA | WHO III | Male | 31 | 564 | 1 | Wildtype |
| CGGA_1601 | Primary | GBM | WHO IV | Male | 66 | 710 | 1 | Wildtype |
| CGGA_1603 | Recurrent | rGBM | WHO IV | Male | 18 | 356 | 1 | Wildtype |
| CGGA_1604 | Recurrent | rGBM | WHO IV | Male | 46 | 740 | 1 | Mutant |
| CGGA_1605 | Recurrent | rGBM | WHO IV | Male | 34 | 321 | 1 | Wildtype |
| CGGA_1606 | Primary | AOA | WHO III | Female | 28 | 471 | 1 | Wildtype |
| CGGA_1607 | Recurrent | rOA | WHO II | Female | 35 | 1333 | 1 | Mutant |
| CGGA_1608 | Recurrent | rAA | WHO III | Male | 38 | 1953 | 0 | Mutant |
| CGGA_1610 | Recurrent | rAOA | WHO III | Male | 39 | 1058 | 1 | NA |
| CGGA_1611 | Recurrent | rGBM | WHO IV | Female | 30 | 1158 | 1 | Mutant |
| CGGA_1612 | Primary | GBM | WHO IV | Male | 68 | 718 | 1 | Wildtype |
| CGGA_1613 | Primary | GBM | WHO IV | Male | 53 | 250 | 0 | Wildtype |
| CGGA_1614 | Recurrent | rAA | WHO III | Male | 51 | 1079 | 1 | Mutant |
| CGGA_1615 | Recurrent | rGBM | WHO IV | Male | 48 | 586 | 1 | Wildtype |
| CGGA_1617 | Primary | O | WHO II | Female | 35 | 1935 | 0 | NA |
| CGGA_1618 | Primary | AOA | WHO III | Male | 31 | 1939 | 0 | Mutant |
| CGGA_1619 | Primary | AA | WHO III | Male | 44 | 766 | 1 | Mutant |
| CGGA_1620 | Primary | AOA | WHO III | Male | 51 | 1932 | 0 | Mutant |
| CGGA_1621 | Primary | OA | WHO II | Female | 48 | 1931 | 0 | Mutant |
| CGGA_1623 | Primary | AOA | WHO III | Female | 16 | 1927 | 0 | Wildtype |
| CGGA_1624 | Recurrent | rGBM | WHO IV | Female | 27 | 87 | 1 | Mutant |
| CGGA_1626 | Primary | GBM | WHO IV | Male | 66 | 696 | 1 | Wildtype |
| CGGA_1627 | Primary | AOA | WHO III | Male | 37 | 1921 | 0 | Mutant |
| CGGA_1630 | Primary | O | WHO II | Male | 26 | 1912 | 0 | NA |
| CGGA_1631 | Recurrent | rGBM | WHO IV | Female | 58 | 221 | 1 | Wildtype |
| CGGA_1634 | Primary | GBM | WHO IV | Female | 26 | 366 | 1 | Wildtype |
| CGGA_1635 | Primary | GBM | WHO IV | Female | 43 | 332 | 1 | Wildtype |
| CGGA_1640 | Primary | AOA | WHO III | Male | 55 | 1886 | 0 | NA |
| CGGA_1641 | Recurrent | rGBM | WHO IV | Female | 57 | 291 | 1 | Wildtype |
| CGGA_1642 | Primary | A | WHO II | Male | 48 | 1885 | 0 | Mutant |
| CGGA_1643 | Primary | GBM | WHO IV | Female | 50 | 170 | 0 | Wildtype |
| CGGA_1644 | Primary | GBM | WHO IV | Male | 48 | 173 | 1 | Wildtype |
| CGGA_1645 | Primary | AA | WHO III | Male | 59 | 1857 | 0 | Mutant |
| CGGA_1647 | Primary | O | WHO II | Male | 40 | 1848 | 0 | NA |
| CGGA_1648 | Primary | AOA | WHO III | Female | 45 | 1747 | 0 | NA |
| CGGA_1649 | Primary | OA | WHO II | Male | 36 | 1844 | 0 | Mutant |
| CGGA_165 | Primary | A | WHO II | Male | 34 | 183 | 0 | NA |
| CGGA_1650 | Primary | GBM | WHO IV | Male | 36 | 1283 | 1 | Mutant |
| CGGA_1651 | Recurrent | rA | WHO II | Female | 44 | 842 | 1 | Mutant |
| CGGA_1653 | Primary | OA | WHO II | Female | 47 | 1837 | 0 | NA |
| CGGA_1654 | Primary | GBM | WHO IV | Male | 61 | NA | NA | Wildtype |
| CGGA_1655 | Primary | OA | WHO II | Male | 48 | 1209 | 0 | Mutant |
| CGGA_1656 | Recurrent | rGBM | WHO IV | Male | 56 | 149 | 1 | Wildtype |
| CGGA_1657 | Primary | AOA | WHO III | Female | 20 | 1835 | 0 | NA |
| CGGA_1658 | Recurrent | rGBM | WHO IV | Female | 64 | 1574 | 1 | Wildtype |
| CGGA_1659 | Recurrent | rGBM | WHO IV | Male | 24 | 387 | 1 | Wildtype |
| CGGA_1660 | Primary | OA | WHO II | Male | 41 | 433 | 0 | Wildtype |
| CGGA_1661 | Primary | AA | WHO III | Female | 42 | 1829 | 0 | NA |
| CGGA_1662 | Primary | OA | WHO II | Female | 55 | 1493 | 0 | Mutant |
| CGGA_1663 | Recurrent | rGBM | WHO IV | Male | 61 | 290 | 1 | Wildtype |
| CGGA_1664 | Primary | O | WHO II | Female | 40 | 1528 | 1 | Mutant |
| CGGA_1666 | Primary | GBM | WHO IV | Male | 60 | 249 | 1 | Wildtype |
| CGGA_1667 | Primary | AO | WHO III | Female | 40 | 1800 | 0 | Mutant |
| CGGA_1669 | Primary | AOA | WHO III | Female | 44 | 139 | 1 | Wildtype |
| CGGA_1670 | Recurrent | rAA | WHO III | Female | 30 | 365 | 1 | Wildtype |
| CGGA_1671 | Primary | AOA | WHO III | Female | 26 | 1788 | 0 | Mutant |
| CGGA_1672 | Primary | AOA | WHO III | Female | 49 | NA | NA | NA |
| CGGA_1673 | Primary | OA | WHO II | Female | 23 | 1781 | 0 | Mutant |
| CGGA_1675 | Primary | AA | WHO III | Male | 38 | 1774 | 0 | Mutant |
| CGGA_1677 | Primary | A | WHO II | Female | 39 | NA | NA | NA |
| CGGA_1678 | Primary | GBM | WHO IV | Male | 51 | 657 | 1 | Wildtype |
| CGGA_1679 | Primary | AOA | WHO III | Female | 52 | 1766 | 0 | Mutant |
| CGGA_1680 | Primary | AA | WHO III | Male | 45 | 596 | 1 | Mutant |
| CGGA_1681 | Primary | GBM | WHO IV | Female | 58 | 346 | 1 | Wildtype |
| CGGA_1682 | Recurrent | rGBM | WHO IV | Male | 67 | 345 | 1 | Wildtype |
| CGGA_1684 | Primary | GBM | WHO IV | Male | 51 | NA | NA | Wildtype |
| CGGA_1685 | Recurrent | rAA | WHO III | Male | 33 | 225 | 1 | Mutant |
| CGGA_1686 | Primary | AA | WHO III | Male | 27 | 745 | 1 | Wildtype |
| CGGA_1687 | Primary | GBM | WHO IV | Male | 14 | 1738 | 0 | Wildtype |
| CGGA_1688 | Recurrent | rAA | WHO III | Female | 51 | 51 | 1 | Wildtype |
| CGGA_1689 | Primary | A | WHO II | Male | 45 | 1738 | 0 | Mutant |
| CGGA_1690 | Primary | GBM | WHO IV | Male | 60 | 592 | 1 | Wildtype |
| CGGA_1693 | Primary | AO | WHO III | Male | 61 | 517 | 1 | NA |
| CGGA_1694 | Primary | GBM | WHO IV | Male | 55 | 624 | 1 | Wildtype |
| CGGA_1695 | Recurrent | rAA | WHO III | Male | 45 | 1714 | 0 | Mutant |
| CGGA_1696 | Primary | AA | WHO III | Male | 72 | 1205 | 0 | Wildtype |
| CGGA_1697 | Recurrent | rGBM | WHO IV | Female | 47 | 89 | 1 | Wildtype |
| CGGA_1698 | Primary | GBM | WHO IV | Female | 55 | 388 | 1 | Wildtype |
| CGGA_1699 | Primary | GBM | WHO IV | Female | 41 | 1708 | 0 | Mutant |
| CGGA_1700 | Primary | AOA | WHO III | Male | 49 | 1696 | 0 | Mutant |
| CGGA_1701 | Primary | AOA | WHO III | Male | 44 | 1696 | 0 | Mutant |
| CGGA_1702 | Recurrent | rGBM | WHO IV | Female | 29 | 168 | 1 | Wildtype |
| CGGA_1703 | Primary | OA | WHO II | Female | 30 | 1592 | 0 | Mutant |
| CGGA_1704 | Primary | A | WHO II | Female | 32 | 1684 | 0 | Wildtype |
| CGGA_1706 | Primary | GBM | WHO IV | Male | 60 | 1688 | 0 | Wildtype |
| CGGA_1708 | Primary | GBM | WHO IV | Female | 54 | 1122 | 1 | Wildtype |
| CGGA_1709 | Primary | GBM | WHO IV | Male | 47 | 415 | 1 | Wildtype |
| CGGA_1713 | Primary | GBM | WHO IV | Male | 62 | 332 | 1 | Wildtype |
| CGGA_1714 | Primary | AOA | WHO III | Female | 37 | 1654 | 0 | NA |
| CGGA_1715 | Primary | O | WHO II | Female | 12 | 1653 | 0 | Wildtype |
| CGGA_1716 | Recurrent | rAA | WHO III | Male | 38 | 951 | 1 | Mutant |
| CGGA_1718 | Primary | AA | WHO III | Female | 37 | 1616 | 0 | Mutant |
| CGGA_1720 | Primary | OA | WHO II | Male | 35 | 1614 | 0 | Mutant |
| CGGA_1721 | Primary | AO | WHO III | Female | 46 | 1614 | 0 | NA |
| CGGA_1722 | Primary | GBM | WHO IV | Female | 60 | 349 | 1 | Wildtype |
| CGGA_1723 | Primary | AOA | WHO III | Female | 39 | 1606 | 0 | Mutant |
| CGGA_1725 | Primary | AOA | WHO III | Female | 33 | 1606 | 0 | Mutant |
| CGGA_1727 | Primary | GBM | WHO IV | Male | 48 | 1600 | 0 | Mutant |
| CGGA_1728 | Primary | GBM | WHO IV | Male | 45 | 917 | 1 | Mutant |
| CGGA_1729 | Recurrent | rGBM | WHO IV | Male | 52 | 244 | 1 | Wildtype |
| CGGA_1731 | Primary | AOA | WHO III | Female | 45 | 1596 | 0 | Mutant |
| CGGA_1735 | Primary | GBM | WHO IV | Male | 54 | 813 | 1 | Wildtype |
| CGGA_1736 | Primary | GBM | WHO IV | Female | 57 | 938 | 1 | Wildtype |
| CGGA_1737 | Primary | AO | WHO III | Male | 33 | 1572 | 0 | Mutant |
| CGGA_1738 | Primary | AA | WHO III | Male | 49 | 469 | 1 | Wildtype |
| CGGA_1739 | Recurrent | rAOA | WHO III | Male | 45 | 515 | 1 | Mutant |
| CGGA_1740 | Primary | GBM | WHO IV | Female | 50 | 363 | 1 | Wildtype |
| CGGA_1743 | Primary | AOA | WHO III | Female | 47 | 1361 | 1 | Mutant |
| CGGA_1744 | Primary | GBM | WHO IV | Male | 51 | 1556 | 0 | NA |
| CGGA_1745 | Primary | AOA | WHO III | Female | 45 | 1549 | 0 | Mutant |
| CGGA_1747 | Primary | AOA | WHO III | Female | 27 | 293 | 1 | NA |
| CGGA_1749 | Primary | GBM | WHO IV | Female | 44 | 401 | 1 | Wildtype |
| CGGA_1750 | Primary | GBM | WHO IV | Female | 52 | 250 | 1 | Wildtype |
| CGGA_1758 | Primary | GBM | WHO IV | Female | 45 | 414 | 1 | Wildtype |
| CGGA_1760 | Recurrent | rA | WHO II | Male | 51 | 459 | 1 | Wildtype |
| CGGA_1764 | Primary | GBM | WHO IV | Male | 33 | 710 | 1 | Mutant |
| CGGA_1767 | Primary | GBM | WHO IV | Male | 63 | 86 | 1 | Wildtype |
| CGGA_1769 | Primary | GBM | WHO IV | Female | 49 | 1474 | 0 | Wildtype |
| CGGA_1770 | Recurrent | rGBM | WHO IV | Female | 43 | 267 | 1 | Mutant |
| CGGA_1771 | Recurrent | rAOA | WHO III | Male | 38 | 1068 | 1 | Mutant |
| CGGA_1773 | Recurrent | rGBM | WHO IV | Female | 46 | 104 | 1 | Wildtype |
| CGGA_1776 | Recurrent | rGBM | WHO IV | Male | 23 | 259 | 1 | Wildtype |
| CGGA_1780 | Primary | GBM | WHO IV | Female | 57 | 1446 | 0 | Wildtype |
| CGGA_1785 | Recurrent | rGBM | WHO IV | Male | 34 | 329 | 1 | Mutant |
| CGGA_1786 | Recurrent | rAO | WHO III | Female | 54 | 1437 | 0 | Mutant |
| CGGA_1791 | Primary | AA | WHO III | Male | 55 | 855 | 1 | Wildtype |
| CGGA_1807 | Primary | GBM | WHO IV | Female | 65 | 247 | 1 | Wildtype |
| CGGA_1809 | Primary | AO | WHO III | Male | 27 | 343 | 1 | Wildtype |
| CGGA_1811 | Recurrent | rGBM | WHO IV | Male | 64 | 304 | 1 | Wildtype |
| CGGA_1812 | Primary | GBM | WHO IV | Male | 65 | 780 | 1 | Wildtype |
| CGGA_1814 | Recurrent | rGBM | WHO IV | Female | 46 | 221 | 1 | Wildtype |
| CGGA_1815 | Recurrent | rGBM | WHO IV | Female | 45 | 185 | 1 | Wildtype |
| CGGA_1817 | Primary | GBM | WHO IV | Female | 72 | 399 | 1 | Wildtype |
| CGGA_1819 | Primary | GBM | WHO IV | Male | 55 | 1323 | 0 | Wildtype |
| CGGA_1820 | Recurrent | rGBM | WHO IV | Female | 52 | 77 | 1 | Wildtype |
| CGGA_1826 | Primary | GBM | WHO IV | Female | 70 | 44 | 1 | Wildtype |
| CGGA_1829 | Primary | OA | WHO II | Male | 23 | 801 | 0 | Wildtype |
| CGGA_1833 | Primary | GBM | WHO IV | Female | 60 | 494 | 1 | Wildtype |
| CGGA_1840 | Primary | GBM | WHO IV | Female | 58 | 1179 | 0 | Wildtype |
| CGGA_1850 | Primary | OA | WHO II | Male | 29 | 750 | 0 | Mutant |
| CGGA_1854 | Primary | AA | WHO III | Male | 36 | 1246 | 0 | Mutant |
| CGGA_1857 | Recurrent | rGBM | WHO IV | Male | 46 | 157 | 1 | Wildtype |
| CGGA_1862 | Primary | AA | WHO III | Male | 40 | 110 | 1 | Wildtype |
| CGGA_1863 | Recurrent | rAOA | WHO III | Female | 50 | 1214 | 0 | Mutant |
| CGGA_1865 | Recurrent | rGBM | WHO IV | Female | 45 | 89 | 1 | Wildtype |
| CGGA_1866 | Primary | GBM | WHO IV | Male | 68 | 127 | 1 | Wildtype |
| CGGA_1870 | Primary | GBM | WHO IV | Male | 62 | 1176 | 0 | Mutant |
| CGGA_1875 | Primary | OA | WHO II | Female | 22 | 1178 | 0 | Wildtype |
| CGGA_1877 | Recurrent | rAOA | WHO III | Male | 35 | NA | NA | Mutant |
| CGGA_1880 | Recurrent | rAA | WHO III | Female | 37 | 1168 | 0 | Mutant |
| CGGA_1882 | Primary | AOA | WHO III | Male | 33 | 1155 | 0 | Mutant |
| CGGA_1886 | Recurrent | rGBM | WHO IV | Male | 31 | 338 | 1 | Wildtype |
| CGGA_1899 | Recurrent | rGBM | WHO IV | Male | 45 | 176 | 1 | Wildtype |
| CGGA_1901 | Primary | GBM | WHO IV | Male | 60 | 540 | 1 | Wildtype |
| CGGA_1902 | Primary | OA | WHO II | Male | 33 | 1103 | 0 | Mutant |
| CGGA_1903 | Primary | AOA | WHO III | Female | 24 | 1098 | 0 | NA |
| CGGA_1906 | Recurrent | rAA | WHO III | Male | 57 | 1054 | 1 | Mutant |
| CGGA_1908 | Recurrent | rGBM | WHO IV | Female | 42 | 298 | 1 | Wildtype |
| CGGA_1911 | Recurrent | rGBM | WHO IV | Male | 15 | 1075 | 0 | Wildtype |
| CGGA_1912 | Recurrent | rGBM | WHO IV | Male | 48 | 507 | 1 | NA |
| CGGA_1916 | Primary | GBM | WHO IV | Female | 33 | NA | 0 | Mutant |
| CGGA_1939 | Recurrent | rA | WHO II | Male | 31 | NA | NA | NA |
| CGGA_194 | Recurrent | rAO | WHO III | Female | 43 | 2304 | 1 | Mutant |
| CGGA_1946 | Recurrent | rGBM | WHO IV | Female | 51 | 142 | 1 | Wildtype |
| CGGA_1953 | Recurrent | rGBM | WHO IV | Male | 47 | 73 | 1 | Wildtype |
| CGGA_1955 | Recurrent | rGBM | WHO IV | Male | 30 | 457 | 1 | NA |
| CGGA_1972 | Recurrent | rGBM | WHO IV | Male | 47 | 915 | 0 | Wildtype |
| CGGA_1976 | Recurrent | rGBM | WHO IV | Female | 53 | 73 | 1 | Wildtype |
| CGGA_1985 | Recurrent | rGBM | WHO IV | Male | 41 | 380 | 1 | Mutant |
| CGGA_1994 | Recurrent | rAO | WHO III | Female | 32 | 862 | 0 | Mutant |
| CGGA_2002 | Recurrent | rA | WHO II | Male | 40 | 572 | 1 | Mutant |
| CGGA_2003 | Recurrent | rGBM | WHO IV | Male | 40 | 827 | 0 | Mutant |
| CGGA_2006 | Recurrent | rAA | WHO III | Male | 43 | 626 | 1 | Mutant |
| CGGA_2008 | Recurrent | rGBM | WHO IV | Male | 56 | 44 | 1 | Wildtype |
| CGGA_2013 | Recurrent | rA | WHO II | Male | 41 | 139 | 1 | Mutant |
| CGGA_2024 | Recurrent | rGBM | WHO IV | Female | 19 | 328 | 1 | Wildtype |
| CGGA_2038 | Recurrent | rGBM | WHO IV | Male | 44 | NA | 1 | Mutant |
| CGGA_2039 | Recurrent | rGBM | WHO IV | Male | 28 | NA | NA | Wildtype |
| CGGA_2046 | Recurrent | rAA | WHO III | Male | 46 | 251 | 1 | Mutant |
| CGGA_2047 | Recurrent | rGBM | WHO IV | Female | 64 | 598 | 1 | Wildtype |
| CGGA_2053 | Recurrent | rGBM | WHO IV | Male | 55 | 640 | 0 | Wildtype |
| CGGA_2056 | Recurrent | rGBM | WHO IV | Female | 41 | 628 | 0 | Mutant |
| CGGA_2062 | Recurrent | rGBM | WHO IV | Female | 63 | 41 | 1 | Mutant |
| CGGA_2075 | Recurrent | rGBM | WHO IV | Male | 63 | 266 | 1 | Wildtype |
| CGGA_2078 | Recurrent | rGBM | WHO IV | Female | 61 | 280 | 1 | Wildtype |
| CGGA_2079 | Recurrent | rAO | WHO III | Male | 45 | 573 | 0 | Mutant |
| CGGA_2081 | Recurrent | rAO | WHO III | Female | 39 | 571 | 0 | Mutant |
| CGGA_2082 | Recurrent | rGBM | WHO IV | Male | 41 | NA | NA | Wildtype |
| CGGA_2088 | Recurrent | rGBM | WHO IV | Female | 30 | NA | NA | Wildtype |
| CGGA_2106 | Recurrent | rGBM | WHO IV | Female | 39 | 501 | 0 | Mutant |
| CGGA_2115 | Recurrent | rGBM | WHO IV | Female | 31 | 171 | 1 | Wildtype |
| CGGA_2121 | Recurrent | rA | WHO II | Female | 41 | 346 | 1 | Mutant |
| CGGA_2129 | Recurrent | rAA | WHO III | Male | 48 | 439 | 0 | Mutant |
| CGGA_265 | Recurrent | rA | WHO II | Male | 43 | 3959 | 0 | Mutant |
| CGGA_279 | Recurrent | rAOA | WHO III | Female | 49 | 1314 | 1 | Mutant |
| CGGA_28 | Primary | A | WHO II | Male | 25 | 1103 | 1 | Mutant |
| CGGA_288 | Recurrent | rO | WHO II | Male | 49 | 1057 | 1 | Mutant |
| CGGA_290 | Primary | OA | WHO II | Female | 37 | 4390 | 0 | Mutant |
| CGGA_320 | Primary | OA | WHO II | Male | 31 | 3005 | 1 | Mutant |
| CGGA_336 | Recurrent | rAOA | WHO III | Female | 57 | 2549 | 1 | Mutant |
| CGGA_358 | Recurrent | rAOA | WHO III | Female | 30 | 122 | 1 | Mutant |
| CGGA_362 | Recurrent | rA | WHO II | Female | 39 | 1680 | 0 | Mutant |
| CGGA_369 | Recurrent | rA | WHO II | Male | 33 | 4271 | 0 | Mutant |
| CGGA_406 | Recurrent | rAOA | WHO III | Female | 24 | 90 | 1 | Mutant |
| CGGA_42 | Primary | A | WHO II | Male | 38 | 2832 | 1 | Mutant |
| CGGA_420 | Recurrent | rAO | WHO III | Female | 39 | 3514 | 0 | Mutant |
| CGGA_457 | Recurrent | rAOA | WHO III | Male | 32 | 75 | 1 | Mutant |
| CGGA_474 | Primary | AO | WHO III | Male | NA | 2029 | 0 | Wildtype |
| CGGA_482 | Primary | OA | WHO II | Male | 45 | 2511 | 1 | Mutant |
| CGGA_487 | Recurrent | rGBM | WHO IV | Male | 46 | 156 | 1 | Wildtype |
| CGGA_492 | Recurrent | rAOA | WHO III | Male | 27 | 652 | 0 | Wildtype |
| CGGA_503 | Primary | OA | WHO II | Male | 51 | 4084 | 0 | Mutant |
| CGGA_507 | Recurrent | rAA | WHO III | Female | 53 | 302 | 1 | Mutant |
| CGGA_509 | Primary | GBM | WHO IV | Male | 38 | 623 | 1 | Wildtype |
| CGGA_521 | Primary | AA | WHO III | Male | 32 | 514 | 1 | Wildtype |
| CGGA_530 | Recurrent | rGBM | WHO IV | Female | 41 | 506 | 1 | Wildtype |
| CGGA_554 | Recurrent | rAOA | WHO III | Female | 46 | 134 | 1 | NA |
| CGGA_568 | Recurrent | rGBM | WHO IV | Male | 14 | 285 | 1 | Wildtype |
| CGGA_583 | Primary | A | WHO II | Female | 36 | 3107 | 1 | Mutant |
| CGGA_619 | Recurrent | rA | WHO II | Male | 40 | 550 | 1 | Wildtype |
| CGGA_621 | Recurrent | rAOA | WHO III | Male | 40 | 1347 | 0 | Mutant |
| CGGA_625 | Recurrent | rAOA | WHO III | Female | 33 | 2465 | 1 | Mutant |
| CGGA_634 | Primary | AOA | WHO III | Female | 35 | 2633 | 1 | Mutant |
| CGGA_652 | Recurrent | rAA | WHO III | Male | 42 | 476 | 1 | Mutant |
| CGGA_663 | Primary | A | WHO II | Female | 29 | 3880 | 0 | Mutant |
| CGGA_703 | Recurrent | rAO | WHO III | Female | 31 | 1355 | 1 | Mutant |
| CGGA_705 | Primary | AA | WHO III | Male | 41 | 1507 | 1 | Mutant |
| CGGA_707 | Primary | OA | WHO II | Female | 39 | 3299 | 1 | Mutant |
| CGGA_720 | Recurrent | rA | WHO II | Female | 46 | 1258 | 1 | Mutant |
| CGGA_721 | Primary | OA | WHO II | Male | 45 | 2552 | 1 | Mutant |
| CGGA_724 | Recurrent | rOA | WHO II | Male | 32 | 3817 | 0 | Mutant |
| CGGA_730 | Recurrent | rOA | WHO II | Female | 51 | 2118 | 1 | Mutant |
| CGGA_763 | Recurrent | rAOA | WHO III | Male | 52 | 319 | 0 | Wildtype |
| CGGA_777 | Recurrent | rGBM | WHO IV | Male | 46 | 146 | 1 | Wildtype |
| CGGA_780 | Recurrent | rAO | WHO III | Female | 64 | 923 | 1 | Wildtype |
| CGGA_799 | Recurrent | rAOA | WHO III | Male | 53 | 1868 | 1 | Mutant |
| CGGA_809 | Primary | A | WHO II | Male | 26 | 1252 | 1 | Mutant |
| CGGA_810 | Recurrent | rAO | WHO III | Male | 20 | 551 | 1 | Wildtype |
| CGGA_825 | Recurrent | rAA | WHO III | Male | 36 | 836 | 1 | Mutant |
| CGGA_831 | Primary | GBM | WHO IV | Female | 55 | 546 | 1 | Wildtype |
| CGGA_846 | Recurrent | rA | WHO II | Female | 39 | 2991 | 0 | Wildtype |
| CGGA_852 | Primary | AA | WHO III | Male | 40 | 169 | 1 | Wildtype |
| CGGA_861 | Primary | AOA | WHO III | Male | 29 | 893 | 1 | Wildtype |
| CGGA_862 | Recurrent | rA | WHO II | Male | 30 | 1046 | 0 | Mutant |
| CGGA_863 | Primary | A | WHO II | Female | 42 | 2073 | 1 | Wildtype |
| CGGA_867 | Recurrent | rAA | WHO III | Female | 40 | 367 | 1 | Mutant |
| CGGA_869 | Recurrent | rGBM | WHO IV | Female | 36 | 537 | 0 | Wildtype |
| CGGA_881 | Recurrent | rAOA | WHO III | Female | 23 | 252 | 1 | Wildtype |
| CGGA_882 | Recurrent | rAOA | WHO III | Male | 30 | 1008 | 0 | Mutant |
| CGGA_883 | Recurrent | rA | WHO II | Female | 39 | 1016 | 0 | Mutant |
| CGGA_887 | Recurrent | rAO | WHO III | Male | 25 | 1011 | 0 | Wildtype |
| CGGA_888 | Recurrent | rAO | WHO III | Male | 29 | 669 | 1 | Mutant |
| CGGA_889 | Primary | A | WHO II | Male | 23 | 3613 | 0 | Mutant |
| CGGA_890 | Primary | AA | WHO III | Male | 39 | 2982 | 1 | Mutant |
| CGGA_901 | Primary | AOA | WHO III | Male | 40 | 929 | 1 | Mutant |
| CGGA_903 | Primary | AOA | WHO III | Female | 27 | 1455 | 1 | Mutant |
| CGGA_D19 | Recurrent | rO | WHO II | Female | 64 | 297 | 1 | Mutant |
| CGGA_D28 | Primary | AA | WHO III | Male | 25 | 860 | 1 | Mutant |
| CGGA_D49 | Recurrent | NA | NA | Female | 32 | NA | NA | Mutant |
| CGGA_D50 | Recurrent | rOA | WHO II | Male | 30 | 782 | 1 | Mutant |
| CGGA_D53 | Recurrent | rGBM | WHO IV | Male | 30 | NA | NA | Wildtype |
| CGGA_J50 | Recurrent | rOA | WHO II | Male | 27 | 1693 | 1 | Mutant |
| CGGA_J73 | Primary | AO | WHO III | Female | 34 | 1134 | 1 | Mutant |
| CGGA_P100 | Primary | GBM | WHO IV | Male | 67 | 268 | 1 | Wildtype |
| CGGA_P102 | Primary | GBM | WHO IV | Male | 30 | 1269 | 1 | Mutant |
| CGGA_P103 | Primary | OA | WHO II | Male | 34 | 1283 | 0 | Mutant |
| CGGA_P104 | Recurrent | rAOA | WHO III | Female | 36 | 167 | 1 | Mutant |
| CGGA_P106 | Recurrent | rGBM | WHO IV | Male | 24 | 71 | 1 | Wildtype |
| CGGA_P107 | Primary | OA | WHO II | Male | 26 | NA | NA | Mutant |
| CGGA_P108 | Primary | AOA | WHO III | Female | 30 | 1276 | 0 | Wildtype |
| CGGA_P109 | Recurrent | rGBM | WHO IV | Male | 35 | 407 | 1 | Mutant |
| CGGA_P11 | Primary | A | WHO II | Female | 38 | 433 | 0 | Mutant |
| CGGA_P110 | Primary | AO | WHO III | Female | 56 | 800 | 1 | Wildtype |
| CGGA_P111 | Primary | OA | WHO II | Female | 44 | 1270 | 0 | Mutant |
| CGGA_P112 | Primary | GBM | WHO IV | Male | 65 | 834 | 1 | Wildtype |
| CGGA_P113 | Primary | OA | WHO II | Male | 32 | 1340 | 0 | Wildtype |
| CGGA_P114 | Primary | OA | WHO II | Male | 32 | NA | 1 | Mutant |
| CGGA_P115 | Primary | OA | WHO II | Male | 25 | 1262 | 0 | Wildtype |
| CGGA_P116 | Primary | GBM | WHO IV | Male | 58 | 305 | 1 | Wildtype |
| CGGA_P121 | Primary | OA | WHO II | Male | 39 | 1244 | 0 | Wildtype |
| CGGA_P122 | Recurrent | rOA | WHO II | Male | 43 | 1274 | 0 | Mutant |
| CGGA_P128 | Primary | OA | WHO II | Male | 41 | 1223 | 0 | Mutant |
| CGGA_P13 | Primary | OA | WHO II | Female | 40 | 1569 | 0 | Mutant |
| CGGA_P131 | Primary | AOA | WHO III | Female | 45 | 1233 | 0 | Mutant |
| CGGA_P132 | Primary | OA | WHO II | Male | 42 | 1240 | 0 | Mutant |
| CGGA_P136 | Primary | GBM | WHO IV | Female | 41 | 842 | 1 | Wildtype |
| CGGA_P137 | Primary | A | WHO II | Male | 42 | 1164 | 0 | Mutant |
| CGGA_P142 | Primary | AOA | WHO III | Male | 45 | 1195 | 0 | Mutant |
| CGGA_P143 | Primary | GBM | WHO IV | Female | 66 | 261 | 1 | Wildtype |
| CGGA_P144 | Primary | AOA | WHO III | Male | 44 | 1196 | 0 | Mutant |
| CGGA_P145 | Primary | OA | WHO II | Male | 53 | 308 | 1 | Mutant |
| CGGA_P146 | Recurrent | rA | WHO II | Male | 31 | 344 | 0 | Mutant |
| CGGA_P147 | Primary | OA | WHO II | Male | 52 | 863 | 1 | Mutant |
| CGGA_P15 | Primary | GBM | WHO IV | Male | 49 | 723 | 1 | NA |
| CGGA_P150 | Primary | OA | WHO II | Male | 34 | 349 | 0 | Mutant |
| CGGA_P151 | Primary | OA | WHO II | Female | 46 | 1219 | 0 | Mutant |
| CGGA_P153 | Primary | A | WHO II | Male | 45 | 1122 | 0 | Mutant |
| CGGA_P154 | Primary | GBM | WHO IV | Male | 50 | NA | NA | Mutant |
| CGGA_P155 | Primary | A | WHO II | Male | 50 | 1121 | 0 | Wildtype |
| CGGA_P156 | Primary | O | WHO II | Male | 30 | 1126 | 0 | Mutant |
| CGGA_P157 | Primary | AOA | WHO III | Female | 55 | 470 | 1 | Wildtype |
| CGGA_P158 | Primary | OA | WHO II | Male | 27 | 1148 | 0 | Mutant |
| CGGA_P159 | Primary | AOA | WHO III | Male | 59 | 211 | 1 | Wildtype |
| CGGA_P16 | Primary | GBM | WHO IV | Male | 38 | 447 | 0 | Mutant |
| CGGA_P160 | Primary | GBM | WHO IV | Female | 72 | 219 | 1 | Wildtype |
| CGGA_P163 | Recurrent | rAO | WHO III | Female | 45 | 855 | 1 | Mutant |
| CGGA_P164 | Primary | GBM | WHO IV | Male | 27 | 1190 | 0 | Wildtype |
| CGGA_P165 | Primary | AOA | WHO III | Female | 51 | 598 | 1 | Mutant |
| CGGA_P17 | Primary | AOA | WHO III | Male | 30 | 1561 | 0 | Mutant |
| CGGA_P172 | Primary | AA | WHO III | Male | 33 | 1107 | 0 | Mutant |
| CGGA_P173 | Primary | OA | WHO II | Male | 31 | 1086 | 0 | Mutant |
| CGGA_P174 | Primary | OA | WHO II | Male | 31 | 1120 | 0 | Mutant |
| CGGA_P175 | Recurrent | rGBM | WHO IV | Male | 45 | 183 | 1 | Wildtype |
| CGGA_P176 | Primary | OA | WHO II | Female | 32 | 804 | 0 | Mutant |
| CGGA_P177 | Primary | OA | WHO II | Male | 43 | 1080 | 0 | Wildtype |
| CGGA_P178 | Primary | GBM | WHO IV | Female | 52 | 1080 | 0 | Wildtype |
| CGGA_P179 | Primary | OA | WHO II | Female | 53 | 1092 | 0 | Mutant |
| CGGA_P18 | Primary | AA | WHO III | Male | 40 | 387 | 1 | Mutant |
| CGGA_P180 | Primary | GBM | WHO IV | Male | 47 | 260 | 1 | Mutant |
| CGGA_P181 | Primary | AA | WHO III | Female | 21 | 238 | 1 | Wildtype |
| CGGA_P182 | Recurrent | rGBM | WHO IV | Female | 58 | 1150 | 0 | Wildtype |
| CGGA_P183 | Primary | AO | WHO III | Male | 58 | 1150 | 0 | Mutant |
| CGGA_P185 | Recurrent | rAA | WHO III | Female | 41 | 502 | 1 | Mutant |
| CGGA_P19 | Primary | OA | WHO II | Male | 39 | 1555 | 0 | Mutant |
| CGGA_P199 | Recurrent | rGBM | WHO IV | Male | 66 | 203 | 1 | Wildtype |
| CGGA_P20 | Primary | A | WHO II | Female | 58 | 1554 | 0 | Mutant |
| CGGA_P205 | Primary | GBM | WHO IV | Male | 66 | 583 | 1 | Wildtype |
| CGGA_P21 | Primary | A | WHO II | Male | 25 | 1553 | 0 | Mutant |
| CGGA_P22 | Primary | GBM | WHO IV | Male | 62 | 406 | 1 | Wildtype |
| CGGA_P23 | Primary | AA | WHO III | Female | 62 | 392 | 1 | Wildtype |
| CGGA_P25 | Primary | GBM | WHO IV | Male | 64 | 147 | 1 | Wildtype |
| CGGA_P265 | Primary | AOA | WHO III | Male | 36 | 779 | 1 | Wildtype |
| CGGA_P266 | Primary | AOA | WHO III | Female | 28 | 253 | 1 | Wildtype |
| CGGA_P269 | Recurrent | rAO | WHO III | Female | 47 | 511 | 1 | Wildtype |
| CGGA_P27 | Primary | OA | WHO II | Female | 37 | 413 | 0 | Mutant |
| CGGA_P270 | Recurrent | rA | WHO II | Male | 33 | 322 | 1 | Mutant |
| CGGA_P271 | Primary | A | WHO II | Male | 42 | 1014 | 0 | Mutant |
| CGGA_P279 | Recurrent | rAO | WHO III | Female | 47 | 972 | 0 | Mutant |
| CGGA_P28 | Primary | GBM | WHO IV | Male | 61 | 107 | 1 | Wildtype |
| CGGA_P280 | Recurrent | rGBM | WHO IV | Female | 52 | 979 | 0 | Wildtype |
| CGGA_P283 | Recurrent | rGBM | WHO IV | Male | 38 | 968 | 0 | Wildtype |
| CGGA_P286 | Recurrent | rOA | WHO II | Female | 57 | 658 | 0 | Mutant |
| CGGA_P29 | Recurrent | rAOA | WHO III | Female | 22 | 103 | 1 | Mutant |
| CGGA_P295 | Recurrent | rGBM | WHO IV | Male | 46 | 273 | 1 | Wildtype |
| CGGA_P298 | Recurrent | rAO | WHO III | Female | 50 | 634 | 0 | Mutant |
| CGGA_P3 | Recurrent | rAOA | WHO III | Male | 32 | 1757 | 0 | Mutant |
| CGGA_P30 | Primary | A | WHO II | Male | 48 | 404 | 1 | Wildtype |
| CGGA_P306 | Recurrent | rO | WHO II | Male | 49 | 895 | 0 | Mutant |
| CGGA_P308 | Recurrent | rAA | WHO III | Male | 38 | 563 | 1 | Mutant |
| CGGA_P31 | Primary | A | WHO II | Male | 42 | 1514 | 0 | Wildtype |
| CGGA_P310 | Recurrent | rAA | WHO III | Female | 47 | 224 | 1 | NA |
| CGGA_P311 | Recurrent | rA | WHO II | Male | 36 | 884 | 0 | Mutant |
| CGGA_P314 | Recurrent | rAO | WHO III | Female | 34 | 875 | 0 | Mutant |
| CGGA_P315 | Recurrent | rOA | WHO II | Female | 47 | 451 | 1 | Mutant |
| CGGA_P316 | Recurrent | rA | WHO II | Male | 44 | 567 | 0 | NA |
| CGGA_P319 | Recurrent | rAOA | WHO III | Male | 37 | 868 | 0 | Mutant |
| CGGA_P326 | Recurrent | rAA | WHO III | Female | 48 | 854 | 0 | Mutant |
| CGGA_P328 | Recurrent | rAA | WHO III | Female | 54 | 580 | 1 | Mutant |
| CGGA_P335 | Recurrent | rGBM | WHO IV | Male | 42 | 840 | 0 | Mutant |
| CGGA_P337 | Recurrent | rAO | WHO III | Female | 61 | 689 | 1 | Mutant |
| CGGA_P338 | Recurrent | rO | WHO II | Male | 51 | 838 | 0 | Wildtype |
| CGGA_P346 | Recurrent | rOA | WHO II | Male | 42 | 522 | 0 | Mutant |
| CGGA_P356 | Recurrent | rOA | WHO II | Female | 22 | 569 | 1 | Mutant |
| CGGA_P358 | Recurrent | rOA | WHO II | Male | 44 | 808 | 0 | Mutant |
| CGGA_P364 | Recurrent | rAA | WHO III | Female | 41 | 495 | 1 | Mutant |
| CGGA_P385 | Recurrent | rGBM | WHO IV | Male | 22 | 754 | 0 | Wildtype |
| CGGA_P388 | Recurrent | rAA | WHO III | Female | 37 | 293 | 1 | Mutant |
| CGGA_P392 | Recurrent | rA | WHO II | Male | 35 | 741 | 0 | Mutant |
| CGGA_P399 | Recurrent | rOA | WHO II | Female | 41 | 732 | 0 | Mutant |
| CGGA_P401 | Recurrent | rGBM | WHO IV | Male | 31 | 788 | 1 | Mutant |
| CGGA_P411 | Recurrent | rGBM | WHO IV | Female | 47 | 440 | 1 | Mutant |
| CGGA_P415 | Recurrent | rGBM | WHO IV | Female | 56 | 195 | 1 | Wildtype |
| CGGA_P416 | Recurrent | rAO | WHO III | Male | 29 | 709 | 0 | Mutant |
| CGGA_P421 | Recurrent | rAA | WHO III | Male | 26 | 308 | 1 | Mutant |
| CGGA_P422 | Primary | OA | WHO II | Female | 41 | 731 | 0 | Mutant |
| CGGA_P437 | Primary | AO | WHO III | Female | 47 | 662 | 0 | Mutant |
| CGGA_P438 | Recurrent | rAO | WHO III | Male | 41 | 662 | 0 | Mutant |
| CGGA_P439 | Recurrent | rA | WHO II | Male | 45 | 661 | 0 | Mutant |
| CGGA_P446 | Recurrent | rAO | WHO III | Female | 47 | 646 | 0 | Mutant |
| CGGA_P461 | Recurrent | rAOA | WHO III | Male | 28 | 626 | 0 | Mutant |
| CGGA_P468 | Primary | AO | WHO III | Female | 42 | 611 | 0 | Mutant |
| CGGA_P483 | Recurrent | rAOA | WHO III | Male | 41 | 299 | 1 | Wildtype |
| CGGA_P492 | Recurrent | rOA | WHO II | Female | 44 | 575 | 0 | Mutant |
| CGGA_P499 | Recurrent | rGBM | WHO IV | Female | 69 | NA | NA | Wildtype |
| CGGA_P5 | Recurrent | rAA | WHO III | Female | 45 | 378 | 1 | Mutant |
| CGGA_P500 | Recurrent | rO | WHO II | Female | 34 | 567 | 0 | Mutant |
| CGGA_P501 | Recurrent | rOA | WHO II | Male | 27 | 563 | 0 | Mutant |
| CGGA_P505 | Recurrent | rOA | WHO II | Male | 34 | 561 | 0 | Mutant |
| CGGA_P508 | Recurrent | rAOA | WHO III | Male | 40 | 555 | 0 | Mutant |
| CGGA_P510 | Recurrent | rAO | WHO III | Male | 42 | 549 | 0 | Mutant |
| CGGA_P512 | Recurrent | rGBM | WHO IV | Male | 23 | 535 | 0 | Wildtype |
| CGGA_P520 | Recurrent | rAO | WHO III | Female | 44 | 521 | 0 | Mutant |
| CGGA_P568 | Recurrent | rAOA | WHO III | Female | 23 | 218 | 1 | Mutant |
| CGGA_P585 | Recurrent | rGBM | WHO IV | Male | 50 | 431 | 0 | Wildtype |
| CGGA_P594 | Recurrent | rAOA | WHO III | Male | 40 | 84 | 1 | Wildtype |
| CGGA_P596 | Recurrent | rGBM | WHO IV | Female | 60 | 411 | 0 | Mutant |
| CGGA_P604 | Recurrent | rAOA | WHO III | Female | 15 | 262 | 1 | Wildtype |
| CGGA_P609 | Primary | GBM | WHO IV | Female | 19 | 380 | 0 | Wildtype |
| CGGA_P610 | Recurrent | rGBM | WHO IV | Male | 62 | 373 | 0 | Wildtype |
| CGGA_P615 | Recurrent | rOA | WHO II | Male | 40 | NA | NA | Mutant |
| CGGA_P619 | Recurrent | rGBM | WHO IV | Female | 66 | 354 | 0 | Wildtype |
| CGGA_P623 | Primary | AOA | WHO III | Male | 52 | NA | NA | Mutant |
| CGGA_P625 | Recurrent | rGBM | WHO IV | Female | 46 | 161 | 1 | Mutant |
| CGGA_P633 | Recurrent | rAOA | WHO III | Female | 40 | 327 | 0 | Mutant |
| CGGA_P7 | Recurrent | rGBM | WHO IV | Male | 45 | 110 | 1 | Wildtype |
| CGGA_P83 | Primary | A | WHO II | Female | 28 | 1330 | 0 | Mutant |
| CGGA_P84 | Primary | A | WHO II | Female | 40 | 1326 | 0 | Mutant |
| CGGA_P86 | Primary | O | WHO II | Female | 34 | 1326 | 0 | Mutant |
| CGGA_P87 | Recurrent | rGBM | WHO IV | Male | 32 | 240 | 1 | Mutant |
| CGGA_P89 | Recurrent | rGBM | WHO IV | Male | 42 | 294 | 1 | Wildtype |
| CGGA_P93 | Primary | A | WHO II | Female | 45 | 1310 | 0 | Mutant |
| CGGA_P98 | Recurrent | rAOA | WHO III | Male | 44 | 317 | 1 | Mutant |
| CGGA_P99 | Recurrent | rGBM | WHO IV | Male | 52 | 679 | 0 | Mutant |

**Table S2** The list of primer sequences used in this study.

| 1 | CXCL11 | forward | 5′ - | GTGGCAGATATTGAGAAAG | - 3′ |
| --- | --- | --- | --- | --- | --- |
|  |  | reverse | 5′ - | CTTCGATTTGGGATTTAGG | - 3′ |
|  |  |  |  |  |  |
| 2 | CXCL5 | forward | 5′ - | TCTTCGCTCCTCCAATCTC | - 3′ |
|  |  | reverse | 5′ - | CCTTGCGTGGTCTGTAAAC | - 3′ |
|  |  |  |  |  |  |
| 3 | GRPR | forward | 5′ - | TGGCTATTTGGCAGGATTGG | - 3′ |
|  |  | reverse | 5′ - | GCTCATTAGAGTGTGGGTATGG | - 3′ |
|  |  |  |  |  |  |
| 4 | GAPDH | forward | 5′ - | AATCCCATCACCATCTTC | - 3′ |
|  |  | reverse | 5′ - | AGGCTGTTGTCATACTTC | - 3′ |

**Table S3** Details about Z- summary score of 10 selected modules in WGCNA.

| Module | Gene number | Z- summary score |
| --- | --- | --- |
| turquoise | 2288 | 39.57361603 |
| brown | 645 | 37.67757461 |
| blue | 864 | 37.09637724 |
| yellow | 445 | 24.04209348 |
| grey | 898 | 20.27742823 |
| red | 239 | 19.41565456 |
| pink | 113 | 18.27421588 |
| green | 275 | 18.05900802 |
| black | 176 | 17.66250146 |
| magenta | 54 | 11.90820536 |

**Table S4** Details about enrichment analyses of genes in blue and yellow modules.

Table S4-1 Details about enrichment analyses of genes in blue module

| GOID | GOTerm | Ontology Source | Term PValue |
| --- | --- | --- | --- |
| CN043648 | Nonsyndromic hearing loss and deafness | CLINVAR_Human-diseases_08.05.2020 | 0.02 |
| GO:0005801 | cis-Golgi network | GO_CellularComponent-EBI-UniProt-GOA-ACAP-ARAP_08.05.2020_00h00 | 0.00 |
| GO:0007030 | Golgi organization | GO_BiologicalProcess-EBI-UniProt-GOA-ACAP-ARAP_08.05.2020_00h00 | 0.00 |
| GO:0005795 | Golgi stack | GO_CellularComponent-EBI-UniProt-GOA-ACAP-ARAP_08.05.2020_00h00 | 0.00 |
| GO:0031985 | Golgi cisterna | GO_CellularComponent-EBI-UniProt-GOA-ACAP-ARAP_08.05.2020_00h00 | 0.00 |
| GO:0000137 | Golgi cis cisterna | GO_CellularComponent-EBI-UniProt-GOA-ACAP-ARAP_08.05.2020_00h00 | 0.00 |
| GO:0032580 | Golgi cisterna membrane | GO_CellularComponent-EBI-UniProt-GOA-ACAP-ARAP_08.05.2020_00h00 | 0.00 |
| KEGG:04742 | Taste transduction | KEGG_08.05.2020 | 0.00 |
| R-HSA:3296233 | T2Rs bind bitter-tasting compounds | REACTOME_Reactions_08.05.2020 | 0.00 |
| R-HSA:420499 | Class C/3 (Metabotropic glutamate/pheromone receptors) | REACTOME_Pathways_08.05.2020 | 0.00 |
| GO:0098889 | intrinsic component of presynaptic membrane | GO_CellularComponent-EBI-UniProt-GOA-ACAP-ARAP_08.05.2020_00h00 | 0.00 |
| GO:0050909 | sensory perception of taste | GO_BiologicalProcess-EBI-UniProt-GOA-ACAP-ARAP_08.05.2020_00h00 | 0.00 |
| GO:0050912 | detection of chemical stimulus involved in sensory perception of taste | GO_BiologicalProcess-EBI-UniProt-GOA-ACAP-ARAP_08.05.2020_00h00 | 0.00 |
| GO:0099056 | integral component of presynaptic membrane | GO_CellularComponent-EBI-UniProt-GOA-ACAP-ARAP_08.05.2020_00h00 | 0.00 |
| GO:0001580 | detection of chemical stimulus involved in sensory perception of bitter taste | GO_BiologicalProcess-EBI-UniProt-GOA-ACAP-ARAP_08.05.2020_00h00 | 0.00 |
| GO:0008527 | taste receptor activity | GO_BiologicalProcess-EBI-UniProt-GOA-ACAP-ARAP_08.05.2020_00h00 | 0.00 |
| GO:0050913 | sensory perception of bitter taste | GO_BiologicalProcess-EBI-UniProt-GOA-ACAP-ARAP_08.05.2020_00h00 | 0.00 |
| GO:0033038 | bitter taste receptor activity | GO_BiologicalProcess-EBI-UniProt-GOA-ACAP-ARAP_08.05.2020_00h00 | 0.00 |
| KEGG:04080 | Neuroactive ligand-receptor interaction | KEGG_08.05.2020 | 0.00 |
| R-HSA:379048 | Liganded Gq/11-activating GPCRs act as GEFs for Gq/11 | REACTOME_Reactions_08.05.2020 | 0.00 |
| R-HSA:749448 | Liganded Gq-activating GPCRs bind inactive heterotrimeric Gq | REACTOME_Reactions_08.05.2020 | 0.00 |
| R-HSA:749452 | The Ligand:GPCR:Gq complex dissociates | REACTOME_Reactions_08.05.2020 | 0.00 |
| WP:24 | Peptide GPCRs | WikiPathways_08.05.2020 | 0.00 |
| WP:455 | GPCRs, Class A Rhodopsin-like | WikiPathways_08.05.2020 | 0.00 |
| GO:0001653 | peptide receptor activity | GO_MolecularFunction-EBI-UniProt-GOA-ACAP-ARAP_08.05.2020_00h00 | 0.00 |
| GO:0017046 | peptide hormone binding | GO_MolecularFunction-EBI-UniProt-GOA-ACAP-ARAP_08.05.2020_00h00 | 0.00 |
| GO:0007200 | phospholipase C-activating G protein-coupled receptor signaling pathway | GO_BiologicalProcess-EBI-UniProt-GOA-ACAP-ARAP_08.05.2020_00h00 | 0.00 |
| GO:0045777 | positive regulation of blood pressure | GO_BiologicalProcess-EBI-UniProt-GOA-ACAP-ARAP_08.05.2020_00h00 | 0.00 |
| GO:0008528 | G protein-coupled peptide receptor activity | GO_BiologicalProcess-EBI-UniProt-GOA-ACAP-ARAP_08.05.2020_00h00 | 0.00 |
| GO:0008188 | neuropeptide receptor activity | GO_BiologicalProcess-EBI-UniProt-GOA-ACAP-ARAP_08.05.2020_00h00 | 0.01 |
| KEGG:04742 | Taste transduction | KEGG_08.05.2020 | 0.00 |
| WP:4900 | Purinergic signaling | WikiPathways_08.05.2020 | 0.00 |
| GO:0051354 | negative regulation of oxidoreductase activity | GO_BiologicalProcess-EBI-UniProt-GOA-ACAP-ARAP_08.05.2020_00h00 | 0.00 |
| GO:0070050 | neuron cellular homeostasis | GO_BiologicalProcess-EBI-UniProt-GOA-ACAP-ARAP_08.05.2020_00h00 | 0.00 |
| GO:0032768 | regulation of monooxygenase activity | GO_BiologicalProcess-EBI-UniProt-GOA-ACAP-ARAP_08.05.2020_00h00 | 0.00 |
| GO:0032769 | negative regulation of monooxygenase activity | GO_BiologicalProcess-EBI-UniProt-GOA-ACAP-ARAP_08.05.2020_00h00 | 0.00 |
| GO:0098889 | intrinsic component of presynaptic membrane | GO_CellularComponent-EBI-UniProt-GOA-ACAP-ARAP_08.05.2020_00h00 | 0.00 |
| GO:0004517 | nitric-oxide synthase activity | GO_BiologicalProcess-EBI-UniProt-GOA-ACAP-ARAP_08.05.2020_00h00 | 0.00 |
| GO:0050999 | regulation of nitric-oxide synthase activity | GO_BiologicalProcess-EBI-UniProt-GOA-ACAP-ARAP_08.05.2020_00h00 | 0.00 |
| GO:0051001 | negative regulation of nitric-oxide synthase activity | GO_BiologicalProcess-EBI-UniProt-GOA-ACAP-ARAP_08.05.2020_00h00 | 0.00 |
| GO:0099056 | integral component of presynaptic membrane | GO_CellularComponent-EBI-UniProt-GOA-ACAP-ARAP_08.05.2020_00h00 | 0.00 |
| GO:0032228 | regulation of synaptic transmission, GABAergic | GO_BiologicalProcess-EBI-UniProt-GOA-ACAP-ARAP_08.05.2020_00h00 | 0.00 |
| GO:0051966 | regulation of synaptic transmission, glutamatergic | GO_BiologicalProcess-EBI-UniProt-GOA-ACAP-ARAP_08.05.2020_00h00 | 0.02 |
| GO:0051932 | synaptic transmission, GABAergic | GO_BiologicalProcess-EBI-UniProt-GOA-ACAP-ARAP_08.05.2020_00h00 | 0.01 |
| GO:0099509 | regulation of presynaptic cytosolic calcium ion concentration | GO_BiologicalProcess-EBI-UniProt-GOA-ACAP-ARAP_08.05.2020_00h00 | 0.00 |
| GO:0005245 | voltage-gated calcium channel activity | GO_BiologicalProcess-EBI-UniProt-GOA-ACAP-ARAP_08.05.2020_00h00 | 0.00 |

Table S4-2 Details about enrichment analyses of genes in yellow module

| GOID | GOTerm | Ontology Source | Term PValue |
| --- | --- | --- | --- |
| WP:2849 | Hematopoietic Stem Cell Differentiation | WikiPathways_08.05.2020 | 0.00 |
| R-HSA:3296233 | T2Rs bind bitter-tasting compounds | REACTOME_Reactions_08.05.2020 | 0.00 |
| R-HSA:420499 | Class C/3 (Metabotropic glutamate/pheromone receptors) | REACTOME_Pathways_08.05.2020 | 0.00 |
| GO:0050909 | sensory perception of taste | GO_BiologicalProcess-EBI-UniProt-GOA-ACAP-ARAP_08.05.2020_00h00 | 0.00 |
| GO:0050912 | detection of chemical stimulus involved in sensory perception of taste | GO_BiologicalProcess-EBI-UniProt-GOA-ACAP-ARAP_08.05.2020_00h00 | 0.00 |
| GO:0001580 | detection of chemical stimulus involved in sensory perception of bitter taste | GO_BiologicalProcess-EBI-UniProt-GOA-ACAP-ARAP_08.05.2020_00h00 | 0.00 |
| GO:0050913 | sensory perception of bitter taste | GO_BiologicalProcess-EBI-UniProt-GOA-ACAP-ARAP_08.05.2020_00h00 | 0.00 |

**Table S5** Nodes' scores of genes calculated by cytoHubba.

Table S5-1. Nodes' scores of genes in blue module calculated by cytohubba

| node_name | MCC | DMNC | MNC | Degree | EPC | BottleNeck | EcCentricity | Closeness | Radiality | Betweenness | Stress | ClusteringCoefficient |
| --- | --- | --- | --- | --- | --- | --- | --- | --- | --- | --- | --- | --- |
| HTR1B | 723 | 0.71324 | 6 | 9 | 12.778 | 27 | 0.07031 | 15.61667 | 3.42368 | 432 | 432 | 0.41667 |
| P2RY4 | 721 | 0.71324 | 6 | 7 | 12.574 | 2 | 0.06027 | 12.82619 | 3.13161 | 50 | 50 | 0.71429 |
| GRM5 | 121 | 0.64826 | 5 | 6 | 11.624 | 27 | 0.08438 | 14.03333 | 3.40745 | 336 | 336 | 0.66667 |
| GRPR | 121 | 0.64826 | 5 | 6 | 11.395 | 7 | 0.08438 | 12.95 | 3.27764 | 240 | 240 | 0.66667 |
| NMBR | 121 | 0.64826 | 5 | 6 | 11.313 | 2 | 0.08438 | 12.31667 | 3.19651 | 50 | 50 | 0.66667 |
| GALR1 | 720 | 0.71324 | 6 | 6 | 12.51 | 1 | 0.06027 | 12.32619 | 3.11538 | 0 | 0 | 1 |
| RXFP3 | 720 | 0.71324 | 6 | 6 | 12.516 | 1 | 0.06027 | 12.32619 | 3.11538 | 0 | 0 | 1 |
| TAS2R31 | 720 | 0.71324 | 6 | 6 | 12.531 | 1 | 0.06027 | 12.32619 | 3.11538 | 0 | 0 | 1 |
| TAS2R4 | 720 | 0.71324 | 6 | 6 | 12.63 | 1 | 0.06027 | 12.32619 | 3.11538 | 0 | 0 | 1 |
| TAS2R5 | 720 | 0.71324 | 6 | 6 | 12.612 | 1 | 0.06027 | 12.32619 | 3.11538 | 0 | 0 | 1 |
| AVPR1A | 120 | 0.64826 | 5 | 5 | 11.227 | 1 | 0.08438 | 11.81667 | 3.18029 | 0 | 0 | 1 |
| GNRHR | 120 | 0.64826 | 5 | 5 | 11.41 | 1 | 0.08438 | 11.81667 | 3.18029 | 0 | 0 | 1 |
| LPAR4 | 120 | 0.64826 | 5 | 5 | 11.275 | 1 | 0.08438 | 11.81667 | 3.18029 | 0 | 0 | 1 |
| CDKL5 | 4 | 0 | 1 | 4 | 7.487 | 6 | 0.07031 | 10.96667 | 3.03425 | 224 | 224 | 0 |
| GPR20 | 7 | 0.46346 | 3 | 4 | 8.957 | 5 | 0.06027 | 11.90952 | 3.14784 | 176 | 176 | 0.5 |
| GLP1R | 7 | 0.46346 | 3 | 4 | 7.658 | 2 | 0.05273 | 9.83452 | 2.80709 | 50 | 50 | 0.5 |
| AMY2B | 3 | 0 | 1 | 3 | 2.485 | 4 | 0.0625 | 3 | 0.1875 | 6 | 6 | 0 |
| RGS7BP | 3 | 0 | 1 | 3 | 2.444 | 4 | 0.0625 | 3 | 0.1875 | 6 | 6 | 0 |
| ENSG00000260342 | 4 | 0.30898 | 3 | 3 | 3.012 | 1 | 0.0625 | 3 | 0.1875 | 1 | 2 | 0.66667 |
| ENSG00000270800 | 4 | 0.30898 | 3 | 3 | 3 | 1 | 0.0625 | 3 | 0.1875 | 1 | 2 | 0.66667 |
| HTR4 | 6 | 0.46346 | 3 | 3 | 7.35 | 1 | 0.05273 | 9.33452 | 2.79087 | 0 | 0 | 1 |
| MC5R | 6 | 0.46346 | 3 | 3 | 7.579 | 1 | 0.05273 | 9.33452 | 2.79087 | 0 | 0 | 1 |
| PRKG2 | 2 | 0 | 1 | 2 | 4.904 | 3 | 0.06027 | 8.57619 | 2.69351 | 96 | 96 | 0 |
| NPR3 | 2 | 0 | 1 | 2 | 3.545 | 2 | 0.05273 | 7.17976 | 2.32031 | 50 | 50 | 0 |
| EIF2S3L | 2 | 0.30779 | 2 | 2 | 2.759 | 1 | 0.03125 | 2.5 | 0.16667 | 0 | 0 | 1 |
| FRRS1 | 2 | 0.30779 | 2 | 2 | 2.827 | 1 | 0.03125 | 2.5 | 0.16667 | 0 | 0 | 1 |
| POU3F4 | 2 | 0.30779 | 2 | 2 | 2.203 | 1 | 0.04688 | 2 | 0.09375 | 0 | 0 | 1 |
| POU4F3 | 2 | 0.30779 | 2 | 2 | 2.193 | 1 | 0.04688 | 2 | 0.09375 | 0 | 0 | 1 |
| TMC1 | 2 | 0.30779 | 2 | 2 | 2.188 | 1 | 0.04688 | 2 | 0.09375 | 0 | 0 | 1 |
| ANKRD33B | 1 | 0 | 1 | 1 | 1.521 | 1 | 0.03125 | 1 | 0.09375 | 0 | 0 | 0 |
| ASB3 | 1 | 0 | 1 | 1 | 1.474 | 1 | 0.03125 | 1 | 0.09375 | 0 | 0 | 0 |
| BHLHA15 | 1 | 0 | 1 | 1 | 1.495 | 1 | 0.03125 | 1 | 0.09375 | 0 | 0 | 0 |
| BRCA2 | 1 | 0 | 1 | 1 | 1.508 | 1 | 0.03125 | 1 | 0.09375 | 0 | 0 | 0 |
| BTBD8 | 1 | 0 | 1 | 1 | 1.479 | 1 | 0.03125 | 1 | 0.09375 | 0 | 0 | 0 |
| C10orf131 | 1 | 0 | 1 | 1 | 1.481 | 1 | 0.03125 | 1 | 0.09375 | 0 | 0 | 0 |
| C21orf140 | 1 | 0 | 1 | 1 | 6.339 | 1 | 0.07031 | 8.25 | 2.79087 | 0 | 0 | 0 |
| CCDC158 | 1 | 0 | 1 | 1 | 1.521 | 1 | 0.03125 | 1 | 0.09375 | 0 | 0 | 0 |
| CD207 | 1 | 0 | 1 | 1 | 1.488 | 1 | 0.03125 | 1 | 0.09375 | 0 | 0 | 0 |
| CLMP | 1 | 0 | 1 | 1 | 2.496 | 1 | 0.04688 | 5.67063 | 1.91466 | 0 | 0 | 0 |
| CMKBR6 | 1 | 0 | 1 | 1 | 1.488 | 1 | 0.03125 | 1 | 0.09375 | 0 | 0 | 0 |
| DHFR | 1 | 0 | 1 | 1 | 6.848 | 1 | 0.06027 | 9.65952 | 3.01803 | 0 | 0 | 0 |
| ENSG00000157654 | 1 | 0 | 1 | 1 | 4.107 | 1 | 0.06027 | 7.65952 | 2.62861 | 0 | 0 | 0 |
| ENSG00000269948 | 1 | 0 | 1 | 1 | 1.481 | 1 | 0.03125 | 1 | 0.09375 | 0 | 0 | 0 |
| GPR89B | 1 | 0 | 1 | 1 | 1.495 | 1 | 0.03125 | 1 | 0.09375 | 0 | 0 | 0 |
| HYDIN | 1 | 0 | 1 | 1 | 1.491 | 1 | 0.03125 | 1 | 0.09375 | 0 | 0 | 0 |
| INS-IGF2 | 1 | 0 | 1 | 1 | 4.799 | 1 | 0.04688 | 7.03135 | 2.40144 | 0 | 0 | 0 |
| IRS4 | 1 | 0 | 1 | 1 | 1.474 | 1 | 0.03125 | 1 | 0.09375 | 0 | 0 | 0 |
| LDHAL6A | 1 | 0 | 1 | 1 | 1.967 | 1 | 0.03125 | 2 | 0.14583 | 0 | 0 | 0 |
| LDHAL6B | 1 | 0 | 1 | 1 | 1.968 | 1 | 0.03125 | 2 | 0.14583 | 0 | 0 | 0 |
| NBPF11 | 1 | 0 | 1 | 1 | 1.495 | 1 | 0.03125 | 1 | 0.09375 | 0 | 0 | 0 |
| NXF5 | 1 | 0 | 1 | 1 | 4.452 | 1 | 0.06027 | 7.65952 | 2.62861 | 0 | 0 | 0 |
| ONECUT1 | 1 | 0 | 1 | 1 | 1.495 | 1 | 0.03125 | 1 | 0.09375 | 0 | 0 | 0 |
| P2RX3 | 1 | 0 | 1 | 1 | 7 | 1 | 0.05273 | 8.36786 | 2.72596 | 0 | 0 | 0 |
| PARG | 1 | 0 | 1 | 1 | 1.508 | 1 | 0.03125 | 1 | 0.09375 | 0 | 0 | 0 |
| PCDHA11 | 1 | 0 | 1 | 1 | 1.469 | 1 | 0.03125 | 1 | 0.09375 | 0 | 0 | 0 |
| PCDHA4 | 1 | 0 | 1 | 1 | 1.469 | 1 | 0.03125 | 1 | 0.09375 | 0 | 0 | 0 |
| PCDHAC1 | 1 | 0 | 1 | 1 | 1.478 | 1 | 0.03125 | 1 | 0.09375 | 0 | 0 | 0 |
| PDC | 1 | 0 | 1 | 1 | 1.944 | 1 | 0.03125 | 2 | 0.14583 | 0 | 0 | 0 |
| PLCXD2 | 1 | 0 | 1 | 1 | 1.994 | 1 | 0.03125 | 2 | 0.14583 | 0 | 0 | 0 |
| RGS8 | 1 | 0 | 1 | 1 | 1.924 | 1 | 0.03125 | 2 | 0.14583 | 0 | 0 | 0 |
| SLC25A2 | 1 | 0 | 1 | 1 | 1.478 | 1 | 0.03125 | 1 | 0.09375 | 0 | 0 | 0 |
| SRGAP2C | 1 | 0 | 1 | 1 | 1.491 | 1 | 0.03125 | 1 | 0.09375 | 0 | 0 | 0 |
| TREH | 1 | 0 | 1 | 1 | 2 | 1 | 0.03125 | 2 | 0.14583 | 0 | 0 | 0 |
| TSSK3 | 1 | 0 | 1 | 1 | 1.479 | 1 | 0.03125 | 1 | 0.09375 | 0 | 0 | 0 |

Table S5-2. Nodes' scores of genes in yellow module calculated by cytohubba

| node_name | MCC | DMNC | MNC | Degree | EPC | BottleNeck | EcCentricity | Closeness | Radiality | Betweenness | Stress | ClusteringCoefficient |
| --- | --- | --- | --- | --- | --- | --- | --- | --- | --- | --- | --- | --- |
| ENSG00000266953 | 1 | 0 | 1 | 1 | 1.456 | 1 | 0.04762 | 1.83333 | 0.47619 | 0 | 0 | 0 |
| ENSG00000257921 | 1 | 0 | 1 | 1 | 1.662 | 1 | 0.05357 | 2.41667 | 0.72857 | 0 | 0 | 0 |
| ENSG00000144785 | 2 | 0 | 1 | 2 | 1.76 | 2 | 0.07143 | 2.5 | 0.57143 | 4 | 4 | 0 |
| NAT2 | 1 | 0 | 1 | 1 | 1.472 | 1 | 0.04762 | 1.83333 | 0.47619 | 0 | 0 | 0 |
| ACSM3 | 2 | 0 | 1 | 2 | 1.748 | 2 | 0.07143 | 2.5 | 0.57143 | 4 | 4 | 0 |
| ENSG00000272772 | 1 | 0 | 1 | 1 | 1.358 | 1 | 0.07143 | 1 | 0.21429 | 0 | 0 | 0 |
| ENSG00000268434 | 1 | 0 | 1 | 1 | 1.358 | 1 | 0.07143 | 1 | 0.21429 | 0 | 0 | 0 |
| TNFAIP6 | 1 | 0 | 1 | 1 | 2.924 | 1 | 0.08929 | 4.58333 | 1.19048 | 0 | 0 | 0 |
| KLRC4 | 1 | 0 | 1 | 1 | 1.363 | 1 | 0.07143 | 1 | 0.21429 | 0 | 0 | 0 |
| KLRC3 | 1 | 0 | 1 | 1 | 1.363 | 1 | 0.07143 | 1 | 0.21429 | 0 | 0 | 0 |
| TAL2 | 1 | 0 | 1 | 1 | 1.918 | 1 | 0.08929 | 3.5 | 0.87302 | 0 | 0 | 0 |
| GATA1 | 2 | 0 | 1 | 2 | 2.858 | 2 | 0.11905 | 4.83333 | 1.19048 | 16 | 22 | 0 |
| IL5 | 7 | 0.46346 | 3 | 4 | 4.764 | 3 | 0.17857 | 6.5 | 1.42857 | 28 | 40 | 0.5 |
| IL1A | 6 | 0.46346 | 3 | 3 | 4.54 | 1 | 0.11905 | 5.83333 | 1.34921 | 0 | 0 | 1 |
| TAS2R19 | 24 | 0.56839 | 4 | 4 | 5.05 | 1 | 0.08929 | 6.08333 | 1.30952 | 0 | 0 | 1 |
| TAS2R10 | 24 | 0.56839 | 4 | 4 | 5.029 | 1 | 0.08929 | 6.08333 | 1.30952 | 0 | 0 | 1 |
| TAS2R20 | 24 | 0.56839 | 4 | 4 | 4.926 | 1 | 0.08929 | 6.08333 | 1.30952 | 0 | 0 | 1 |
| HNRNPH2 | 2 | 0.30779 | 2 | 2 | 2.336 | 1 | 0.05357 | 3.08333 | 0.81429 | 0 | 0 | 1 |
| GNAT2 | 1 | 0 | 1 | 1 | 1.347 | 1 | 0.07143 | 1 | 0.21429 | 0 | 0 | 0 |
| RRH | 1 | 0 | 1 | 1 | 1.347 | 1 | 0.07143 | 1 | 0.21429 | 0 | 0 | 0 |
| CHMP4C | 1 | 0 | 1 | 1 | 1.342 | 1 | 0.07143 | 1 | 0.21429 | 0 | 0 | 0 |
| ENSG00000249884 | 1 | 0 | 1 | 1 | 1.342 | 1 | 0.07143 | 1 | 0.21429 | 0 | 0 | 0 |
| CXCL5 | 30 | 0.42794 | 6 | 6 | 5.42 | 7 | 0.11905 | 7.33333 | 1.46825 | 12 | 24 | 0.6 |
| CXCL11 | 31 | 0.42794 | 6 | 7 | 5.543 | 3 | 0.11905 | 7.83333 | 1.50794 | 28 | 40 | 0.42857 |
| RPS17 | 3 | 0.30779 | 2 | 3 | 2.627 | 6 | 0.10714 | 4 | 0.98571 | 12 | 16 | 0.33333 |
| ENSG00000215472 | 2 | 0 | 1 | 2 | 2.134 | 2 | 0.07143 | 3.33333 | 0.9 | 8 | 10 | 0 |
| MAGOHB | 4 | 0.30898 | 3 | 3 | 2.668 | 2 | 0.07143 | 3.83333 | 0.94286 | 3 | 6 | 0.66667 |
| RBM8A | 4 | 0.30898 | 3 | 3 | 2.621 | 1 | 0.07143 | 3.83333 | 0.94286 | 3 | 6 | 0.66667 |

**Table S6** Clinical data of 75 patients in our study cohort.

| **id** | **Code** | **Type** | **Primary** | **Metasis** | **surgery_date** | **Follow-up** | **Status** | **Time(months)** | **Gender** | **Age** | **Family_history_of_cancer** | **Laterity** | **Diagnosis** | **Grade** | **Pathology** | **primary_site** | **Seizures** | **radiation_therapy** | **chem-therapy** |
| --- | --- | --- | --- | --- | --- | --- | --- | --- | --- | --- | --- | --- | --- | --- | --- | --- | --- | --- | --- |
| 1 | T01 | Tumor | Brain | NO | 201602 | 2019.05 | Alive | 39 | Female | 40 | NO | Right | LGG | Ⅱ | Oligodendroglioma | Temporal Lobe | NO | NO | NO |
| 2 | T02 | Tumor | Brain | NO | 201602 | N(2017.03) | Dead | 13 | Male | 56 |  | Right | LGG | Ⅲ | Anaplastic oligodendroglioma | Frontal Lobe | NO | YES | Yes |
| 3 | T03 | Tumor | Brain | NO | 201602 | N(2017.05) | Dead | 15 | Female | 46 | NO | Left | GBM | Ⅳ | Glioblastoma | Frontal Lobe | NO | YES | YES |
| 4 | T04 | Tumor | Brain | NO | 201603 | N(2017.07) | Dead | 16 | Male | 55 | NO | Left | GBM | Ⅳ | Glioblastoma | Parietal Lobe | NO |  | NO |
| 5 | T05 | Tumor | Brain | NO | 201603 | N(2019.03) | Dead | 36 | Male | 67 | NO | Left | LGG | Ⅲ | Anaplastic astrocytoma | Temporal Lobe | NO | YES | Yes |
| 6 | T06 | Tumor | Brain | NO | 201603 | 2019.05 | Alive | 38 | Female | 58 |  | Left | LGG | Ⅲ | Anaplastic oligodendroglioma | Frontal Lobe | NO | NO | NO |
| 7 | T07 | Tumor | Brain | NO | 201603 | 2019.05 | Alive | 38 | Male | 69 | YES | Left | LGG | Ⅱ | Oligodendroglioma | Frontal Lobe | NO | NO | NO |
| 8 | T08 | Tumor | Brain | NO | 201603 | 2019.05 | Alive | 38 | Male | 45 | NO | Left | LGG | Ⅲ | Anaplastic oligodendroglioma | Temporal Lobe | Yes | NO | Yes |
| 9 | T09 | Tumor | Brain | NO | 201604 | 2019.05 | Alive | 37 | Male | 50 |  |  | LGG | Ⅲ | Anaplastic oligodendroglioma | Frontal Lobe | Yes | NO | Yes |
| 10 | T10 | Tumor | Brain | NO | 201604 | N(2017.08) | Dead | 20 | Male | 48 |  | Right | GBM | Ⅳ | Glioblastoma | Parietal Lobe |  |  | YES |
| 11 | T11 | Tumor | Brain | NO | 201605 | N(2017.01) | Dead | 8 | Female | 63 |  | Right | GBM | Ⅳ | Glioblastoma | Frontal Lobe | NO | YES | NO |
| 12 | T12 | Tumor | Brain | NO | 201605 | 2019.05 | Alive | 36 | Female | 48 | YES | Right | LGG | Ⅲ | Anaplastic oligodendroglioma | Frontal Lobe | NO | NO | NO |
| 13 | T13 | Tumor | Brain | NO | 201607 | 2019.05 | Alive | 34 | Female | 44 |  | Left | LGG | Ⅲ | Anaplastic astrocytoma | Frontal Lobe | NO |  | Yes |
| 14 | T14 | Tumor | Brain | NO | 201607 | 2019.05 | Alive | 32 | Male | 39 |  | Right | LGG | Ⅱ | Oligodendroglioma | Frontal Lobe | NO | NO | NO |
| 15 | T15 | Tumor | Brain | NO | 201607 | 2019.05 | Alive | 34 | Female | 54 |  | Right | LGG | Ⅱ | Ependymoma | Parietal Lobe | Yes | NO | NO |
| 16 | T16 | Tumor | Brain | NO | 201607 | 2019.05 | NA | NA | Male | 70 | NO | Left | GBM | Ⅳ | Glioblastoma | Parietal Lobe | NO | NO | YES |
| 17 | T17 | Tumor | Brain | NO | 201608 | N(2018.08) | Dead | 24 | Male | 45 |  | Right | LGG | Ⅱ | Oligodendroglioma | Frontal Lobe | NO | NO | NO |
| 18 | T18 | Tumor | Brain | NO | 201609 | N(2018.04) | Dead | 19 | Female | 36 | YES | Left | LGG | Ⅲ | Anaplastic astrocytoma | Temporal Lobe |  | YES | Yes |
| 19 | T19 | Tumor | Brain | NO | 201609 | N(2019.05) | NA | NA | Female | 56 | YES | Left | GBM | Ⅳ | Glioblastoma | Frontal Lobe |  | NO | YES |
| 20 | T20 | Tumor | Brain | NO | 201609 | 2019.05 | Alive | 30 | Female | 65 | NO | Right | LGG | Ⅱ | Oligodendroglioma | Frontal Lobe | NO | NO | NO |
| 21 | T21 | Tumor | Brain | NO | 201610 | N (2016.12) | Dead | 1 | Female | 38 | NO | Left | GBM | Ⅳ | Glioblastoma | Frontal Lobe | NO | NO | YES |
| 22 | T22 | Tumor | Brain | NO | 201610 | 2019.05 | Alive | 31 | Male | 65 |  | Left | GBM | Ⅳ | Glioblastoma | Frontal Lobe |  | YES | YES |
| 23 | T23 | Tumor | Brain | NO | 201610 | N (2017.03) | Dead | 5 | Female | 58 |  | Right | GBM | Ⅳ | Glioblastoma | Temporal Lobe | Yes | YES | NO |
| 24 | T24 | Tumor | Brain | NO | 201610 | 2019.05 | Alive | 29 | Female | 40 | NO | Right | LGG | Ⅱ | Oligodendroglioma | Temporal Lobe |  | NO | NO |
| 25 | T25 | Tumor | Brain | NO | 201611 | N (2017.04) | Dead | 4 | Male | 47 |  | Left | GBM | Ⅳ | Glioblastoma | Frontal Lobe | NO |  | NO |
| 26 | T26 | Tumor | Brain | NO | 201611 | 2019.05 | Alive | 30 | Male | 60 | YES | Left | LGG | Ⅲ | Anaplastic oligodendroglioma | Frontal Lobe | NO | NO | Yes |
| 27 | T27 | Tumor | Brain | NO | 201612 | N (2017.12) | Dead | 12 | Male | 66 |  | Left | GBM | Ⅳ | Glioblastoma | Frontal Lobe | NO | NO | NO |
| 28 | T28 | Tumor | Brain | NO | 201612 | N (2019.9) | Dead | 10 | Male | 53 | YES | Left | GBM | Ⅳ | Glioblastoma | Frontal Lobe | Yes | YES | YES |
| 29 | T29 | Tumor | Brain | NO | 201612 | 2019.05 | Alive | 29 | Female | 55 | NO | Left | LGG | Ⅲ | Anaplastic astrocytoma | Parietal Lobe | NO | NO | Yes |
| 30 | T30 | Tumor | Brain | NO | 201612 | N (2017.08) | Dead | 9 | Male | 79 | NO | Right | GBM | Ⅳ | Glioblastoma | Frontal Lobe | NO | YES | YES |
| 31 | T31 | Tumor | Brain | NO | 201612 | N(2019.01) | Dead | 25 | Male | 37 | NO | Right | LGG | Ⅲ | Anaplastic astrocytoma | Frontal Lobe | NO | YES | Yes |
| 32 | T32 | Tumor | Brain | NO | 201612 | N (2018.09) | Dead | 21 | Female | 53 |  | Right | GBM | Ⅳ | Glioblastoma | Frontal Lobe | NO | NO | YES |
| 33 | T33 | Tumor | Brain | NO | 201701 | N (2017.11) | Dead | 10 | Male | 59 | NO | Right | GBM | Ⅳ | Glioblastoma | Frontal Lobe | NO | YES | YES |
| 34 | T34 | Tumor | Brain | NO | 201701 | 2019.05 | Alive | 28 | Male | 54 | NO | Right | LGG | Ⅱ | Oligodendroglioma | Temporal Lobe | NO | NO | NO |
| 35 | T35 | Tumor | Brain | NO | 201701 | 2019.05 | Alive | 25 | Male | 39 |  | Right | GBM | Ⅳ | Glioblastoma | Frontal Lobe |  | YES | YES |
| 36 | T36 | Tumor | Brain | NO | 201701 | N (2018.03) | Dead | 14 | Female | 80 | NO | Right | GBM | Ⅳ | Glioblastoma | Frontal Lobe | NO | YES | NO |
| 37 | T37 | Tumor | Brain | NO | 201703 | N(2017.04) | Dead | 1 | Male | 48 |  | Right | LGG | Ⅲ | Anaplastic astrocytoma | Frontal Lobe | NO |  | NO |
| 38 | T38 | Tumor | Brain | NO | 201703 | 2019.05 | Alive | 26 | Female | 62 | NO | Left | LGG | Ⅱ | Oligodendroglioma | Frontal Lobe |  | NO | NO |
| 39 | T39 | Tumor | Brain | NO | 201703 | 2019.05 | Alive | 26 | Female | 42 |  | Left | GBM | Ⅳ | Glioblastoma | Frontal Lobe | NO | NO | YES |
| 40 | T40 | Tumor | Brain | NO | 201703 | 2019.05 | Alive | 26 | Male | 44 |  | Right | LGG | Ⅲ | Anaplastic astrocytoma | Frontal Lobe |  | YES | Yes |
| 41 | T41 | Tumor | Brain | NO | 201704 | 2019.05 | Alive | 25 | Male | 44 | NO | Left | LGG | Ⅱ | Oligodendroglioma | Temporal Lobe |  | NO | NO |
| 42 | T42 | Tumor | Brain | NO | 201704 | N (2018.01) | Dead | 9 | Male | 57 | NO | Left | GBM | Ⅳ | Glioblastoma | Brainstem |  | YES | YES |
| 43 | T43 | Tumor | Brain | NO | 201704 | 2019.05 | Alive | 25 | Female | 50 | YES | Left | LGG | Ⅱ | Oligodendroglioma | Frontal Lobe |  | NO | NO |
| 44 | T44 | Tumor | Brain | NO | 201705 | 2019.05 | Alive | 24 | Male | 48 |  | Right | GBM | Ⅳ | Glioblastoma | Frontal Lobe | NO | YES | YES |
| 45 | T45 | Tumor | Brain | NO | 201705 | N (2019.08) | Dead | 3 | Female | 62 | NO | Left | GBM | Ⅳ | Glioblastoma | Temporal Lobe | Yes |  | NO |
| 46 | T46 | Tumor | Brain | NO | 201705 | 2019.05 | NA | NA | Male | 84 | NO | Left | GBM | Ⅳ | Glioblastoma | Frontal Lobe |  |  | YES |
| 47 | T47 | Tumor | Brain | NO | 201706 | N(2019.02) | Dead | 20 | Male | 34 | NO | Left | LGG | Ⅱ | Oligodendroglioma | Frontal Lobe |  | NO | NO |
| 48 | T48 | Tumor | Brain | NO | 201710 | N (2018.03) | Dead | 5 | Female | 66 |  | Left | GBM | Ⅳ | Glioblastoma | Frontal Lobe |  | YES | YES |
| 49 | T49 | Tumor | Brain | NO | 201712 | N (2018.09) | Dead | 9 | Male | 49 |  | Left | GBM | Ⅳ | Glioblastoma | Parietal Lobe | NO | YES | NO |
| 50 | T50 | Tumor | Brain | NO | 201712 | 2019.05 | Alive | 17 | Male | 59 | NO | Left | GBM | Ⅳ | Glioblastoma | Frontal Lobe | NO | YES | YES |
| 51 | N01 | Adjacent tissue | Brain | NA | 201602 | NA | NA | NA | Female | 46 | NA | NA | NA | NA | NA | NA | NA | NA | NA |
| 52 | N02 | Adjacent tissue | Brain | NA | 201603 | NA | NA | NA | Male | 55 | NA | NA | NA | NA | NA | NA | NA | NA | NA |
| 53 | N03 | Adjacent tissue | Brain | NA | 201604 | NA | NA | NA | Male | 50 | NA | NA | NA | NA | NA | NA | NA | NA | NA |
| 54 | N04 | Adjacent tissue | Brain | NA | 201604 | NA | NA | NA | Male | 48 | NA | NA | NA | NA | NA | NA | NA | NA | NA |
| 55 | N05 | Adjacent tissue | Brain | NA | 201605 | NA | NA | NA | Female | 63 | NA | NA | NA | NA | NA | NA | NA | NA | NA |
| 56 | N06 | Adjacent tissue | Brain | NA | 201605 | NA | NA | NA | Female | 48 | NA | NA | NA | NA | NA | NA | NA | NA | NA |
| 57 | N07 | Adjacent tissue | Brain | NA | 201607 | NA | NA | NA | Male | 39 | NA | NA | NA | NA | NA | NA | NA | NA | NA |
| 58 | N08 | Adjacent tissue | Brain | NA | 201607 | NA | NA | NA | Female | 54 | NA | NA | NA | NA | NA | NA | NA | NA | NA |
| 59 | N09 | Adjacent tissue | Brain | NA | 201607 | NA | NA | NA | Male | 70 | NA | NA | NA | NA | NA | NA | NA | NA | NA |
| 60 | N10 | Adjacent tissue | Brain | NA | 201609 | NA | NA | NA | Female | 36 | NA | NA | NA | NA | NA | NA | NA | NA | NA |
| 61 | N11 | Adjacent tissue | Brain | NA | 201609 | NA | NA | NA | Female | 56 | NA | NA | NA | NA | NA | NA | NA | NA | NA |
| 62 | N12 | Adjacent tissue | Brain | NA | 201610 | NA | NA | NA | Female | 38 | NA | NA | NA | NA | NA | NA | NA | NA | NA |
| 63 | N13 | Adjacent tissue | Brain | NA | 201610 | NA | NA | NA | Male | 65 | NA | NA | NA | NA | NA | NA | NA | NA | NA |
| 64 | N14 | Adjacent tissue | Brain | NA | 201611 | NA | NA | NA | Male | 47 | NA | NA | NA | NA | NA | NA | NA | NA | NA |
| 65 | N15 | Adjacent tissue | Brain | NA | 201611 | NA | NA | NA | Male | 60 | NA | NA | NA | NA | NA | NA | NA | NA | NA |
| 66 | N16 | Adjacent tissue | Brain | NA | 201612 | NA | NA | NA | Female | 53 | NA | NA | NA | NA | NA | NA | NA | NA | NA |
| 67 | N17 | Adjacent tissue | Brain | NA | 201701 | NA | NA | NA | Male | 59 | NA | NA | NA | NA | NA | NA | NA | NA | NA |
| 68 | N18 | Adjacent tissue | Brain | NA | 201701 | NA | NA | NA | Female | 80 | NA | NA | NA | NA | NA | NA | NA | NA | NA |
| 69 | N19 | Adjacent tissue | Brain | NA | 201703 | NA | NA | NA | Male | 48 | NA | NA | NA | NA | NA | NA | NA | NA | NA |
| 70 | N20 | Adjacent tissue | Brain | NA | 201703 | NA | NA | NA | Female | 42 | NA | NA | NA | NA | NA | NA | NA | NA | NA |
| 71 | N21 | Adjacent tissue | Brain | NA | 201703 | NA | NA | NA | Male | 44 | NA | NA | NA | NA | NA | NA | NA | NA | NA |
| 72 | N22 | Adjacent tissue | Brain | NA | 201704 | NA | NA | NA | Male | 44 | NA | NA | NA | NA | NA | NA | NA | NA | NA |
| 73 | N23 | Adjacent tissue | Brain | NA | 201705 | NA | NA | NA | Male | 48 | NA | NA | NA | NA | NA | NA | NA | NA | NA |
| 74 | N24 | Adjacent tissue | Brain | NA | 201705 | NA | NA | NA | Male | 84 | NA | NA | NA | NA | NA | NA | NA | NA | NA |
| 75 | N25 | Adjacent tissue | Brain | NA | 201712 | NA | NA | NA | Male | 59 | NA | NA | NA | NA | NA | NA | NA | NA | NA |
